# Supplementary material for: Organic linker geometry controlled synthesis of coordination polymer spheres and their thermal transformation to yolk–shell metal oxides
Source: Royal Society of Chemistry journal article supplement (doi:10.1039/c4ta02535k), 2014-01-01

Electronic supplementary information

**Organic Linker Geometry Controlled Synthesis of Coordination  
Polymer Spheres and Their Thermal Transformation to Yolk-  
Shell Metal Oxides**

Min Wang, Feng Wang,\* Jiping Ma, Jie Xu\*

Dalian National Laboratory for Clean Energy, State Key Laboratory of Catalysis

Dalian Institute of Chemical Physics, Chinese Academy of Sciences, Dalian 116023 ( P.R. China)

\*Corresponding author: E-mail: wangfeng@dicp.ac.cn, xujie@dicp.ac.cn

## **Content:**

1. **Fig. S1** XRD pattern of Eu-CPs.
2. **Fig. S2** TEM image and size-distribution diagram of Eu-CPs prepared in 10 min.
3. **Fig. S3** FT-IR of the Eu-CPs prepared with different precursor concentrations.
4. **Fig. S4** TGA curve of the Eu-CPs.
5. **Table S1.** The preparation condition of the M-CPs.
6. **Fig. S5** TEM images of M-CPs.
7. **Fig. S6** Size distribution diagrams of M-CPs.
8. **Fig. S7** EDS of YEuErLu-CPs.
9. **Fig. S8** SEM and TEM images of the yolk-shell metal oxide spheres.
10. **Fig. S9** XRD patterns of SmYb-MOs with different molar percentage of Yb.
11. **Fig. S10** Size effect of Eu-CPs in the cyanosilylation of benzaldehyde.
12. **Fig. S11** Recycle of the Eu-CPs.
13. **Fig. S12** Fluorescence images.
14. GC-MS spectra.

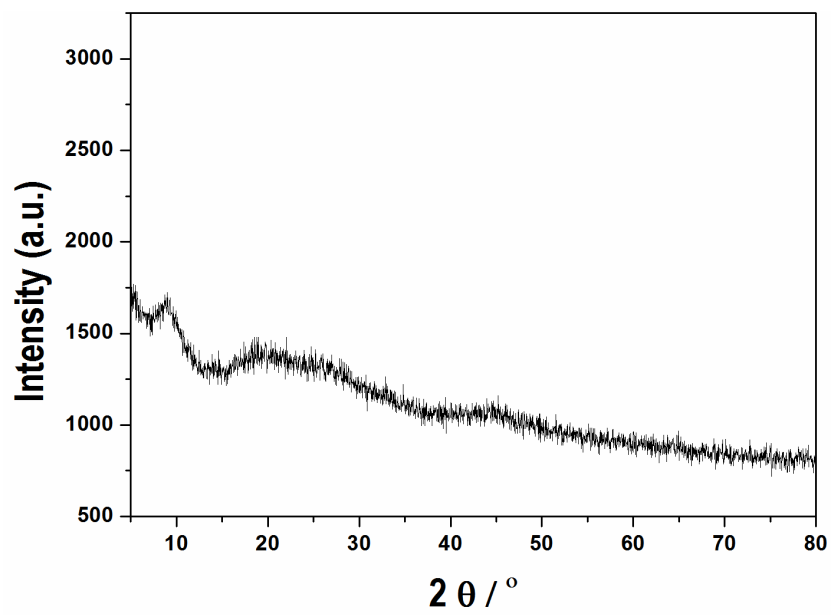

**Fig. S1** XRD pattern of Eu-CPs.

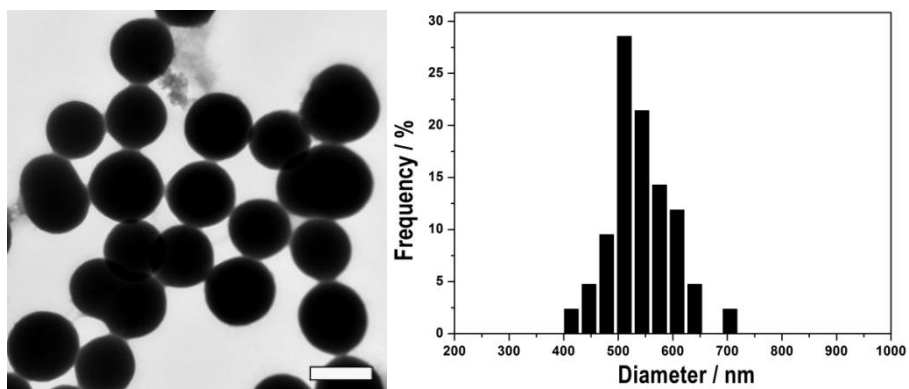

**Fig. S2** TEM image and size-distribution diagram of Eu-CPs prepared under 15 mM precursor concentration at 160 °C for 10 min. Scale bar: 500 nm.

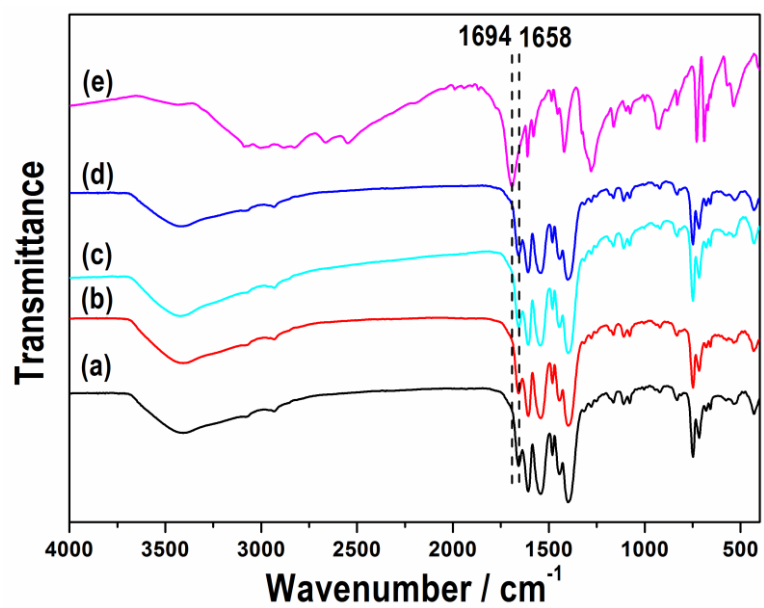

**Fig. S3** FT-IR spectra of the Eu-CPs prepared with different precursor concentrations (a) 2.5 mM, (b) 5 mM, (c) 10 mM and (d) 15 mM. (e) 1,3-Benzenedicarboxylic acid (L5).

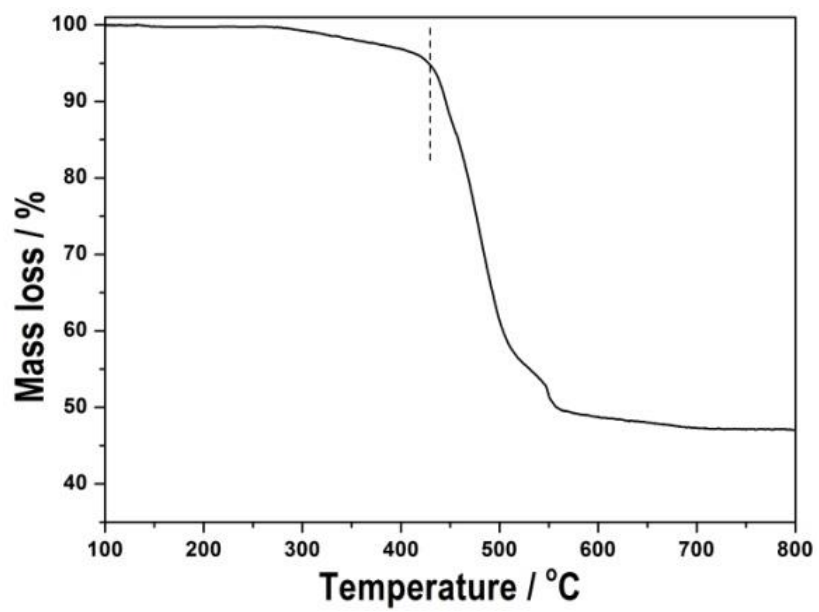

**Fig. S4** TGA curve of the Eu-CPs.

**Table S1** The preparation conditions of the M-CPs.

| Sample         | M / mM | Linker / mM | T / °C | t / min | Diameter / nm |
|----------------|--------|-------------|--------|---------|---------------|
| Ni-CPs         | 10     | 10          | 140    | 360     | 303           |
| Zn-CPs         | 10     | 10          | 140    | 30      | 1366          |
| Mg-CPs         | 5      | 5           | 160    | 360     | 55            |
| In-CPs         | 10     | 10          | 140    | 30      | 155           |
| Y-CPs          | 2.5    | 2.5         | 160    | 30      | 374           |
| Sm-CPs         | 2.5    | 2.5         | 160    | 30      | 342           |
| Gd-CPs         | 2.5    | 2.5         | 160    | 30      | 134           |
| Ho-CPs         | 2.5    | 2.5         | 160    | 30      | 300           |
| Er -CPs        | 2.5    | 2.5         | 160    | 30      | 417           |
| Yb-CPs         | 5      | 5           | 160    | 30      | 250           |
| Lu-CPs         | 2.5    | 2.5         | 160    | 30      | 370           |
| EuGd-CPs (6:4) | 5      | 5           | 160    | 30      | 261           |
| EuGd-CPs (4:6) | 5      | 5           | 160    | 30      | 243           |
| EuYb-CPs       | 5      | 5           | 160    | 30      | 256           |
| EuYYb-CPs      | 7.5    | 7.5         | 160    | 30      | 300           |
| YEuErLu-CPs    | 10     | 10          | 160    | 30      | 520           |

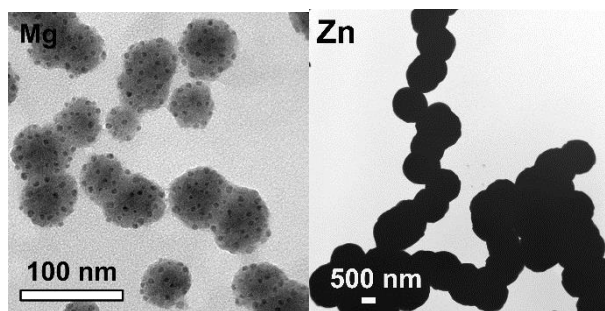

**Fig. S5** TEM images of M-CPs prepared with different metal cations.

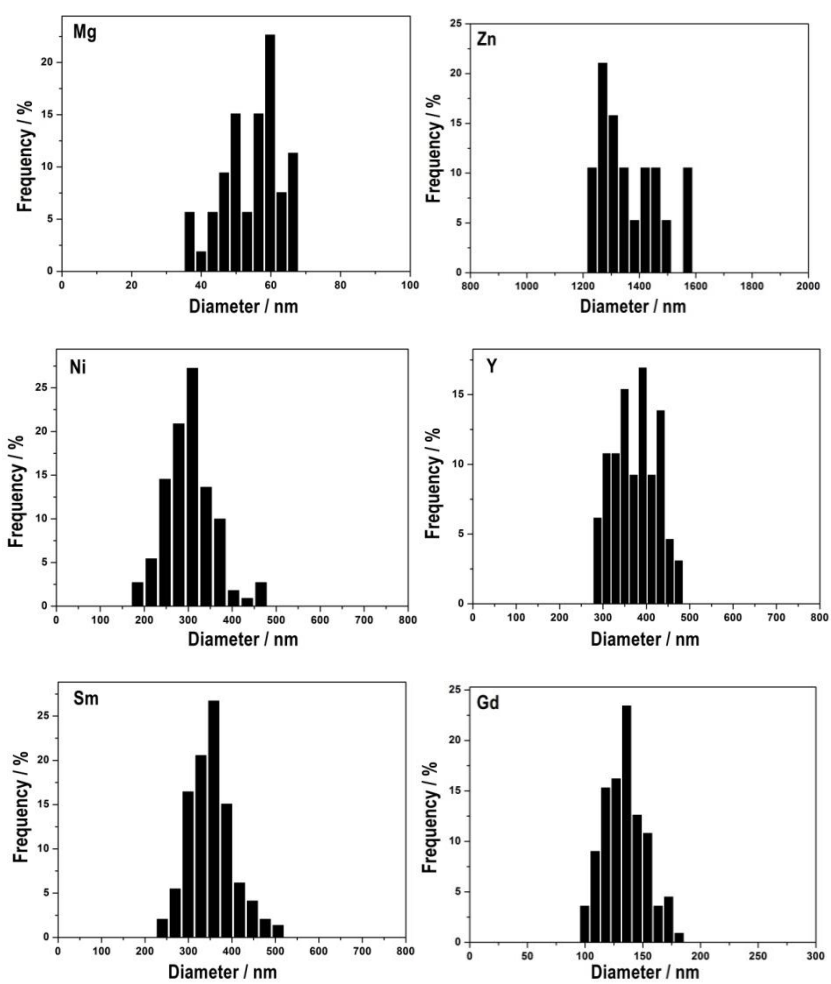



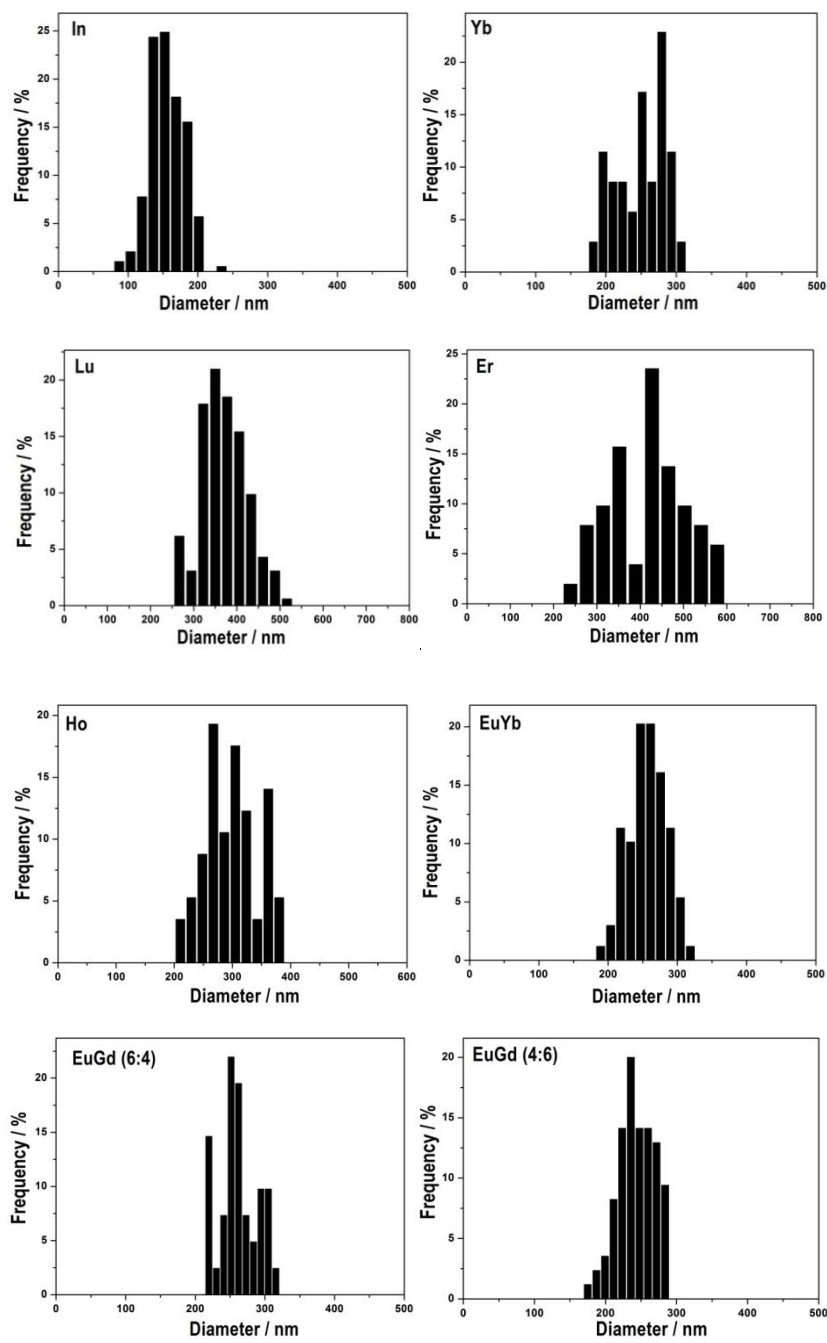

**Fig. S6** Size distribution diagrams of M-CPs.

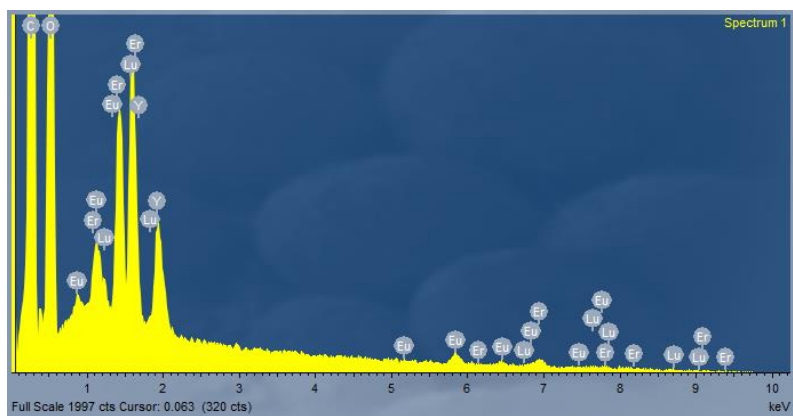

**Fig. S7** EDS of YEuErLu-CPs.

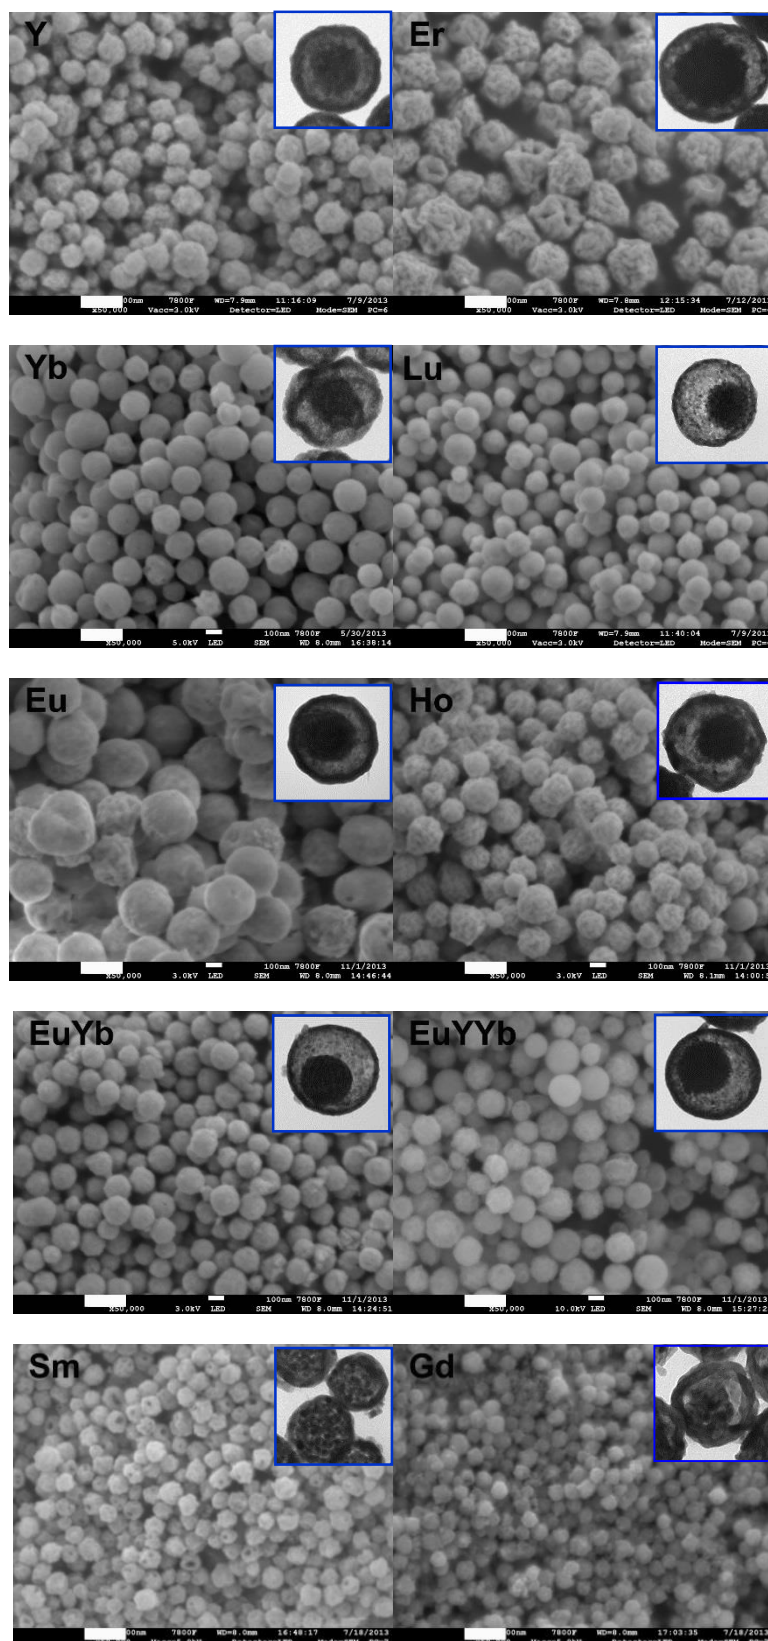

**Fig. S8** SEM and TEM images of the metal oxide spheres obtained by calcination of their respective solid precursors (M-CPs) at 600 °C for 3 h. Scale bars: 200 nm.

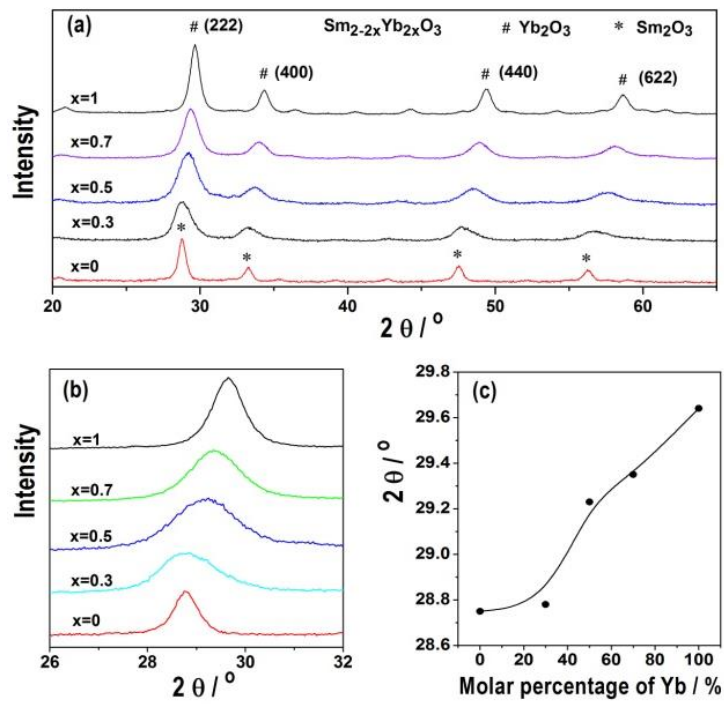

**Fig. S9** XRD patterns (a, b) of SmYb-MOs with different molar percentage of Yb. (c) The changes of (222) peak degree with Yb content.

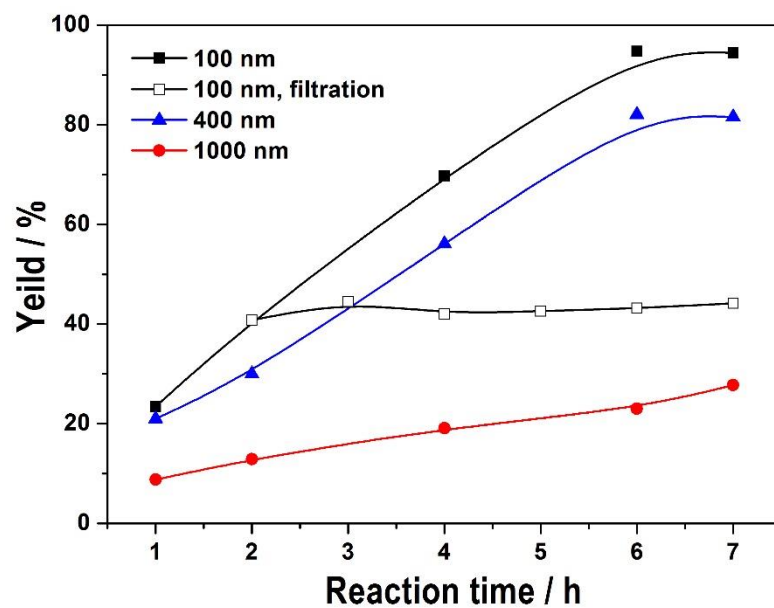

**Fig. S10** Size effect of Eu-CPs on the cyanosilylation of benzaldehyde and filtration experiment. Reaction conditions: 5 mg catalyst, 0.25 mmol benzaldehyde, 0.5 mmol Me<sub>3</sub>SiCN, 1.5 mL CH<sub>2</sub>Cl<sub>2</sub>, room temperature, under Ar.

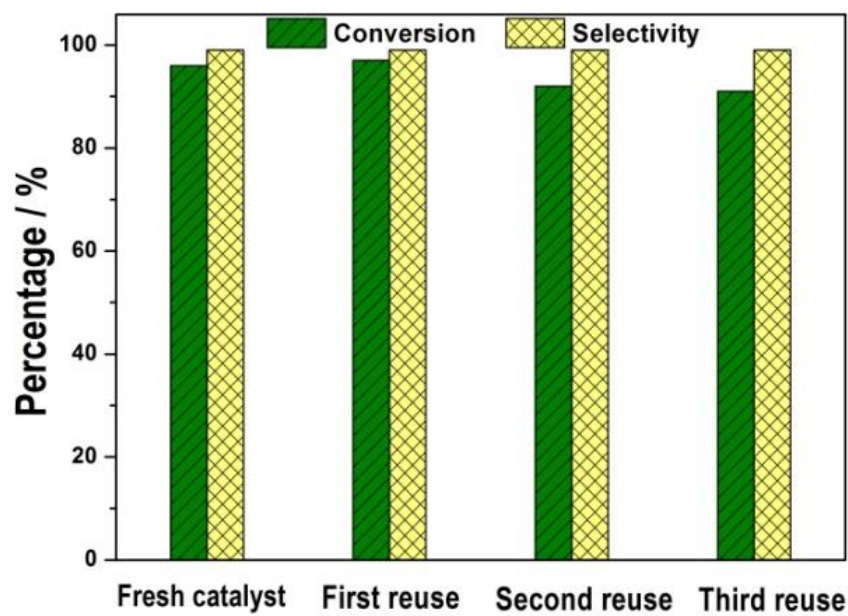

**Fig. S11** Recycle of the Eu-CPs. Reaction conditions: 5 mg catalyst, 0.25 mmol benzaldehyde, 0.5 mmol Me<sub>3</sub>SiCN, 1.5 mL CH<sub>2</sub>Cl<sub>2</sub>, room temperature, 6 h, under Ar.

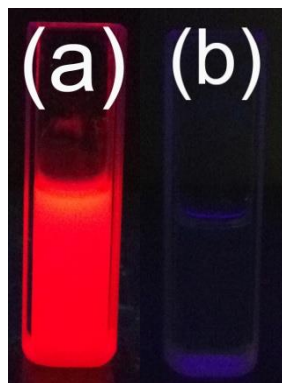

**Fig. S12** Fluorescence images (excited at 245 nm) of diluted reaction solution (a) and after filtration (b).

GC-MS spectra (Table 1, entry 1)

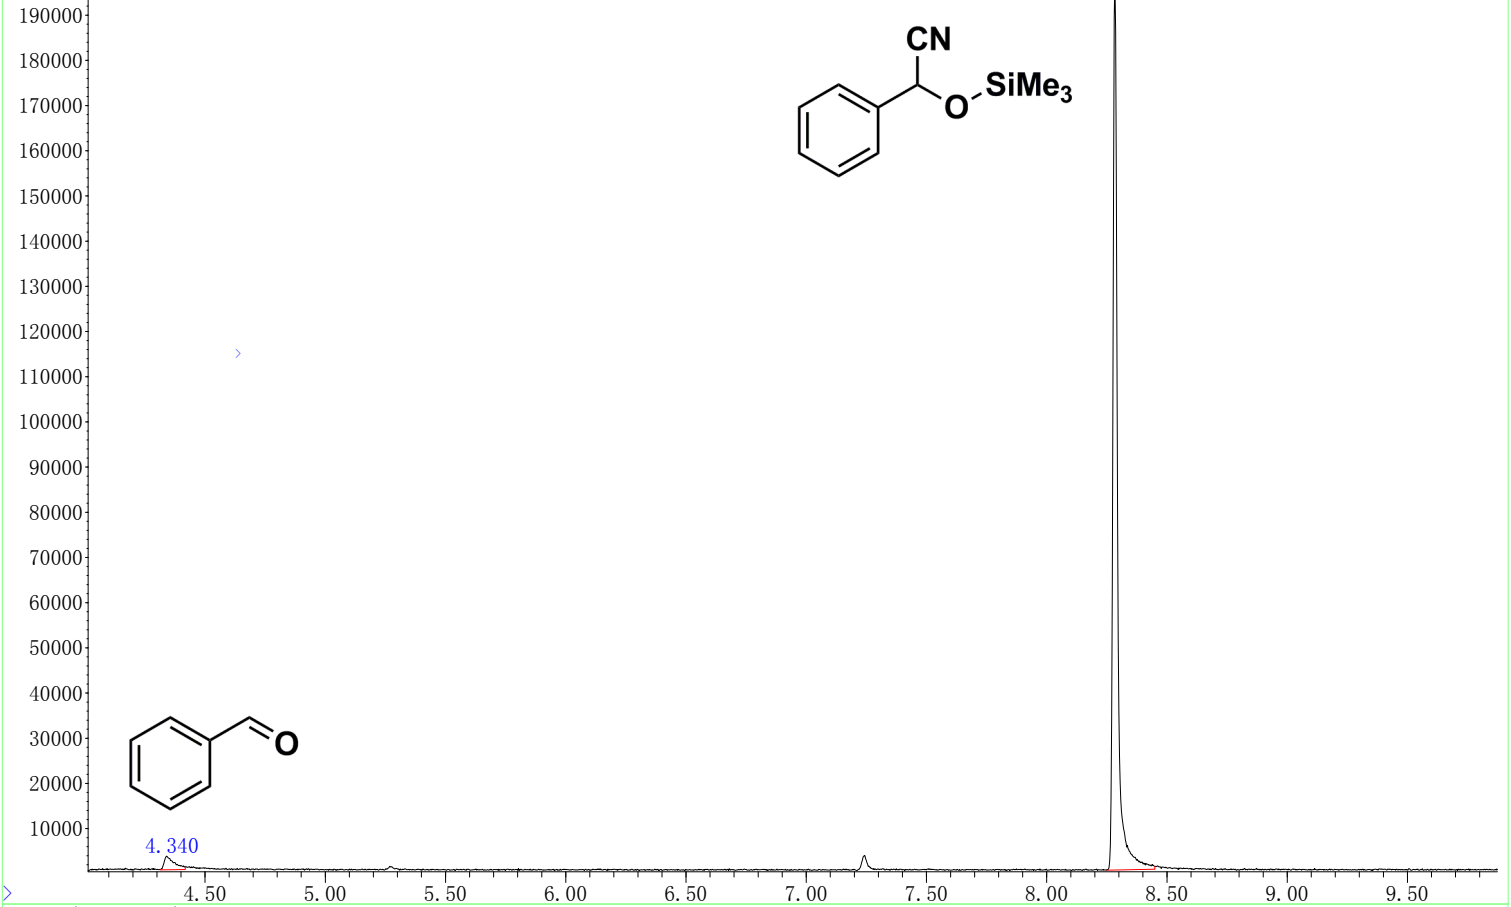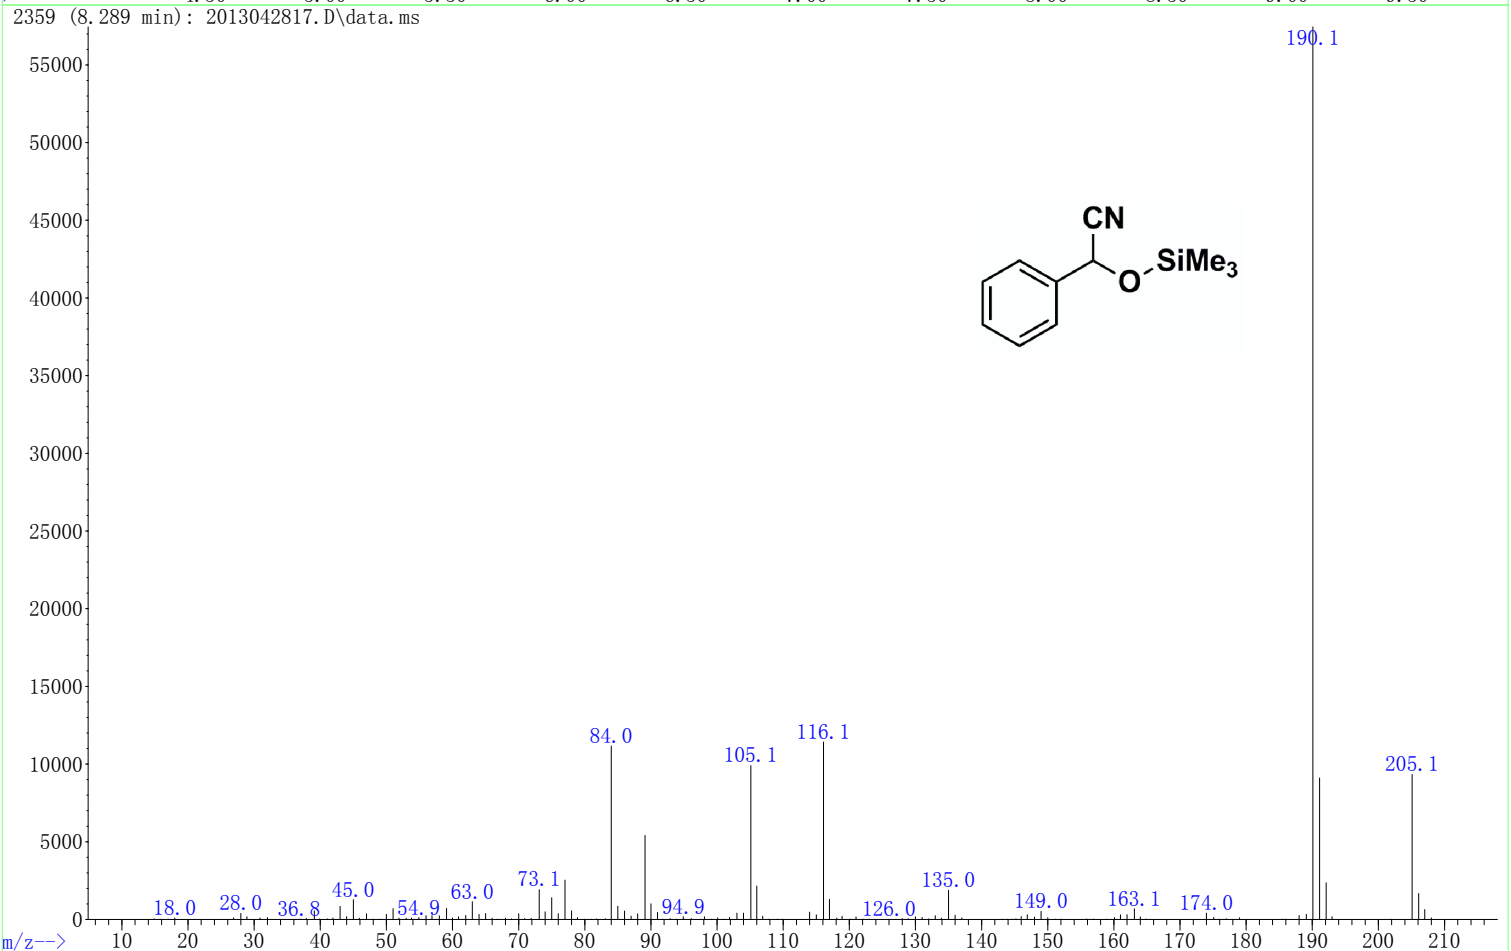



GC-MS spectra (Table 1, entry 2)

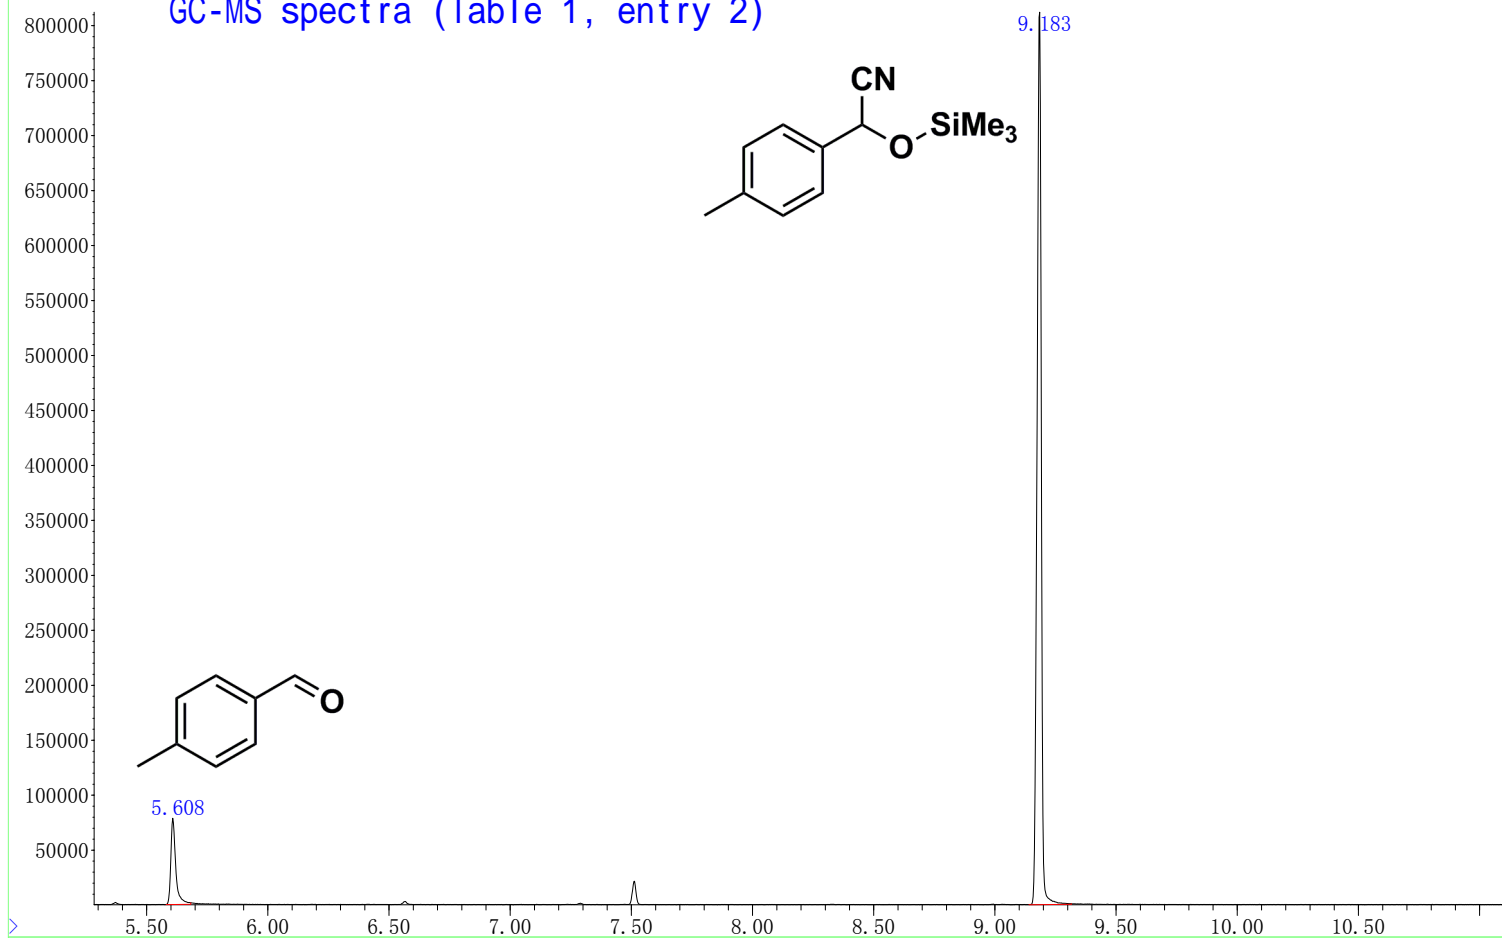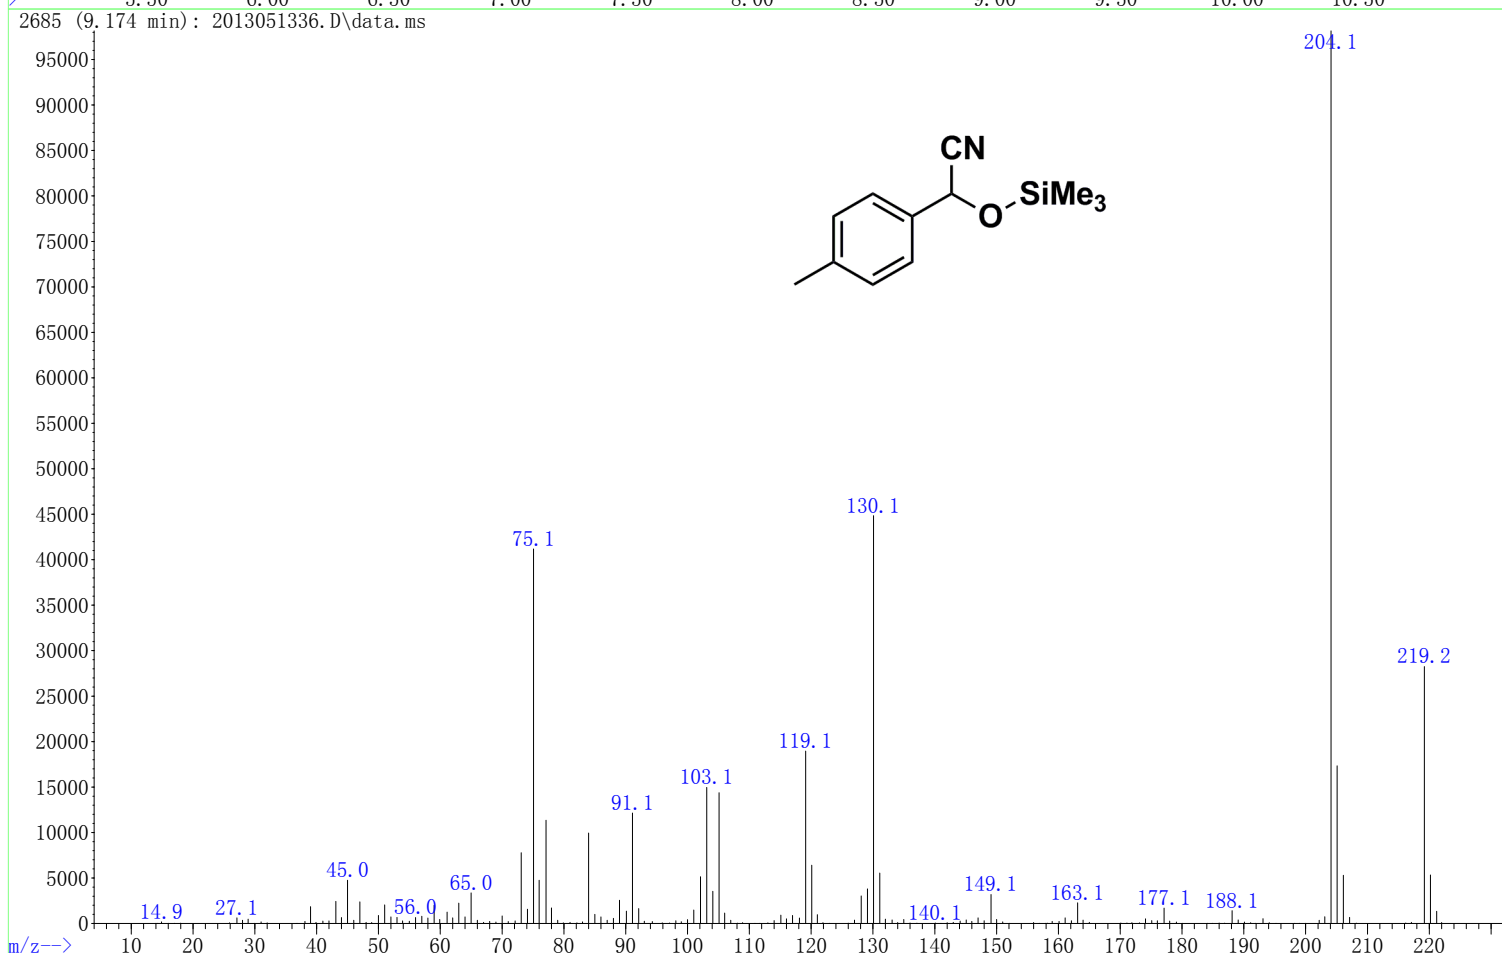

GC-MS spectra (Table 1, entry 3)

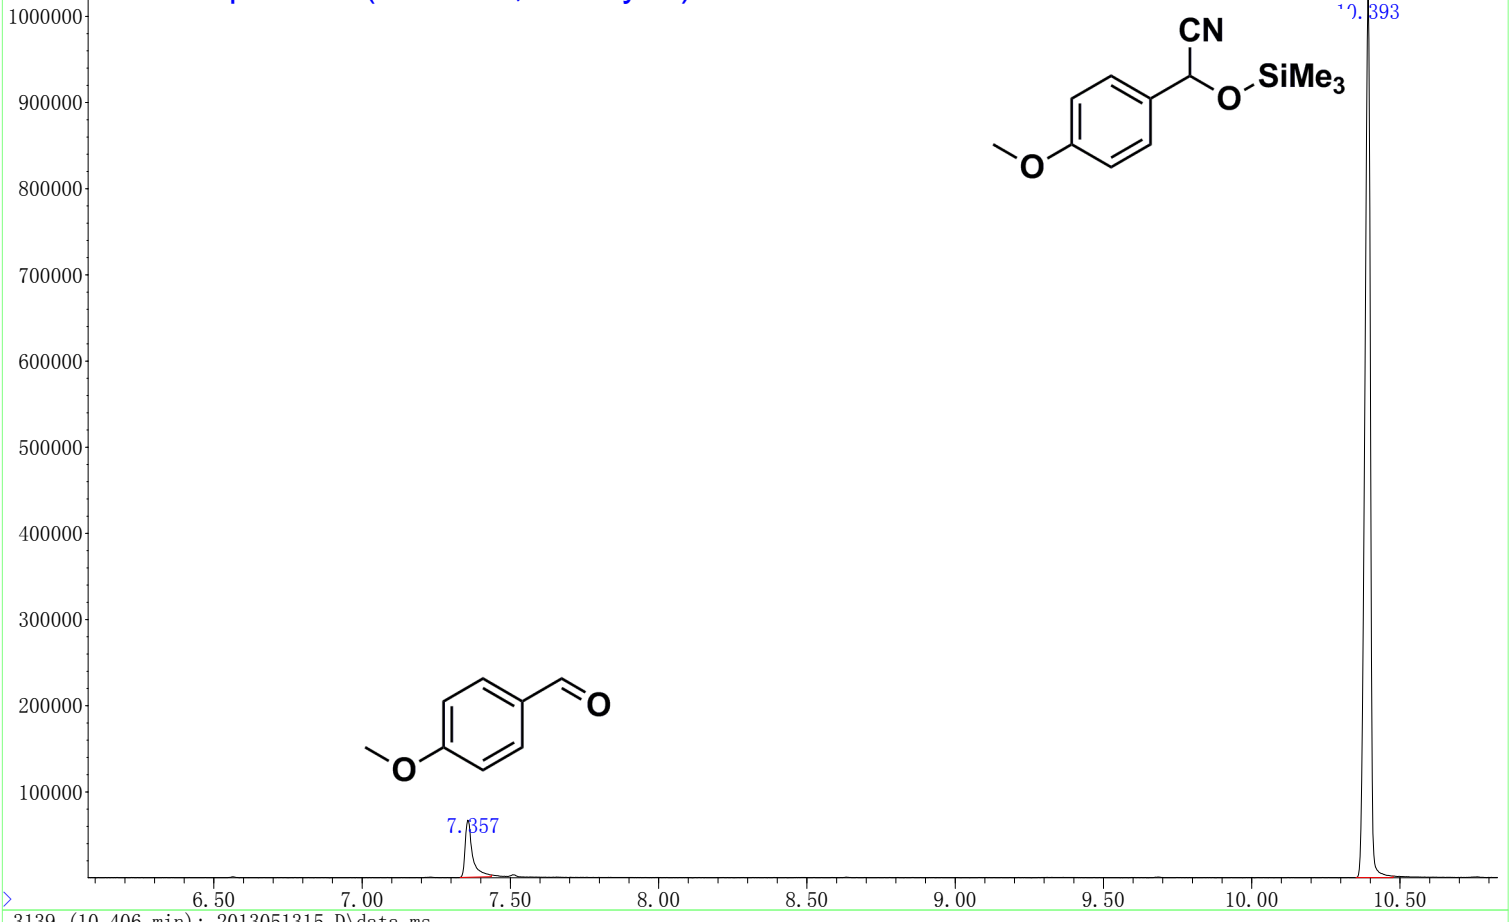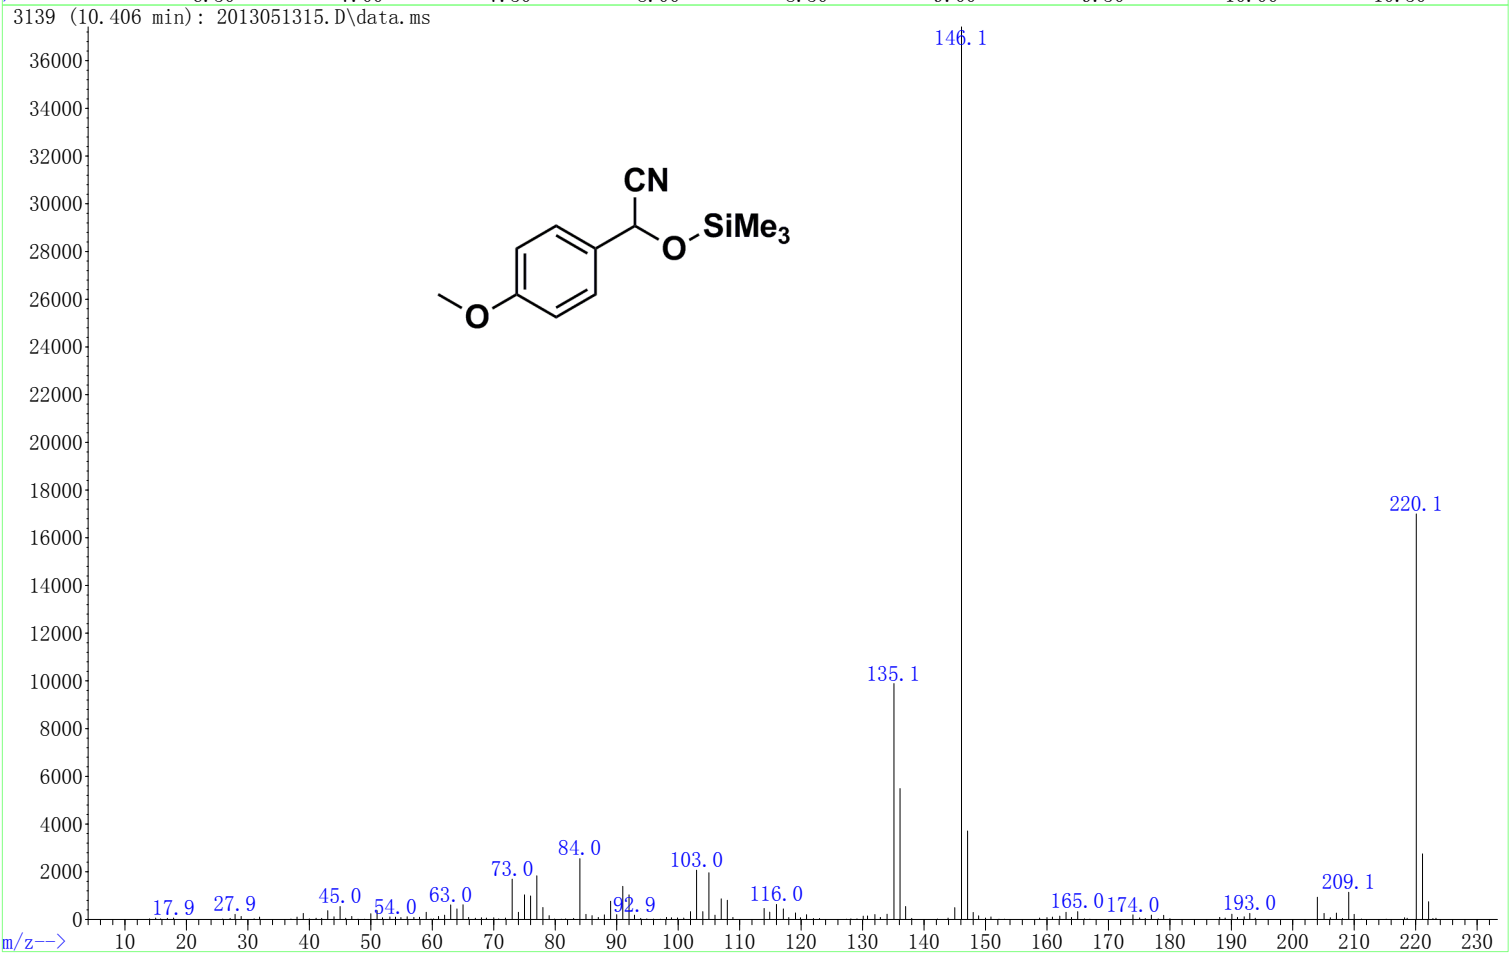

GC-MS spectra (Table 1, entry 4)

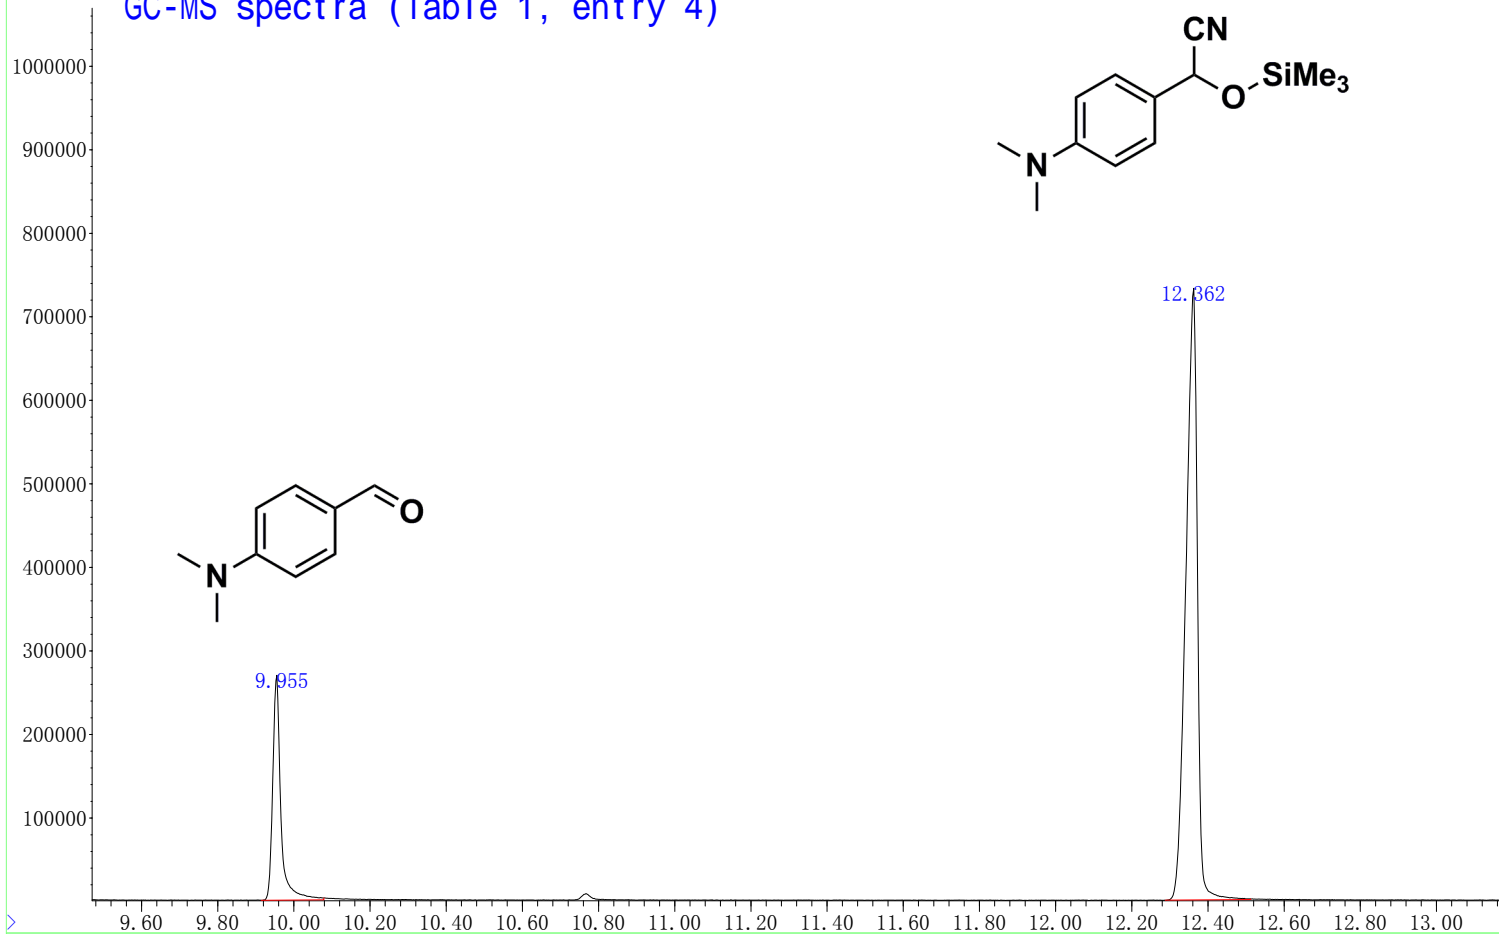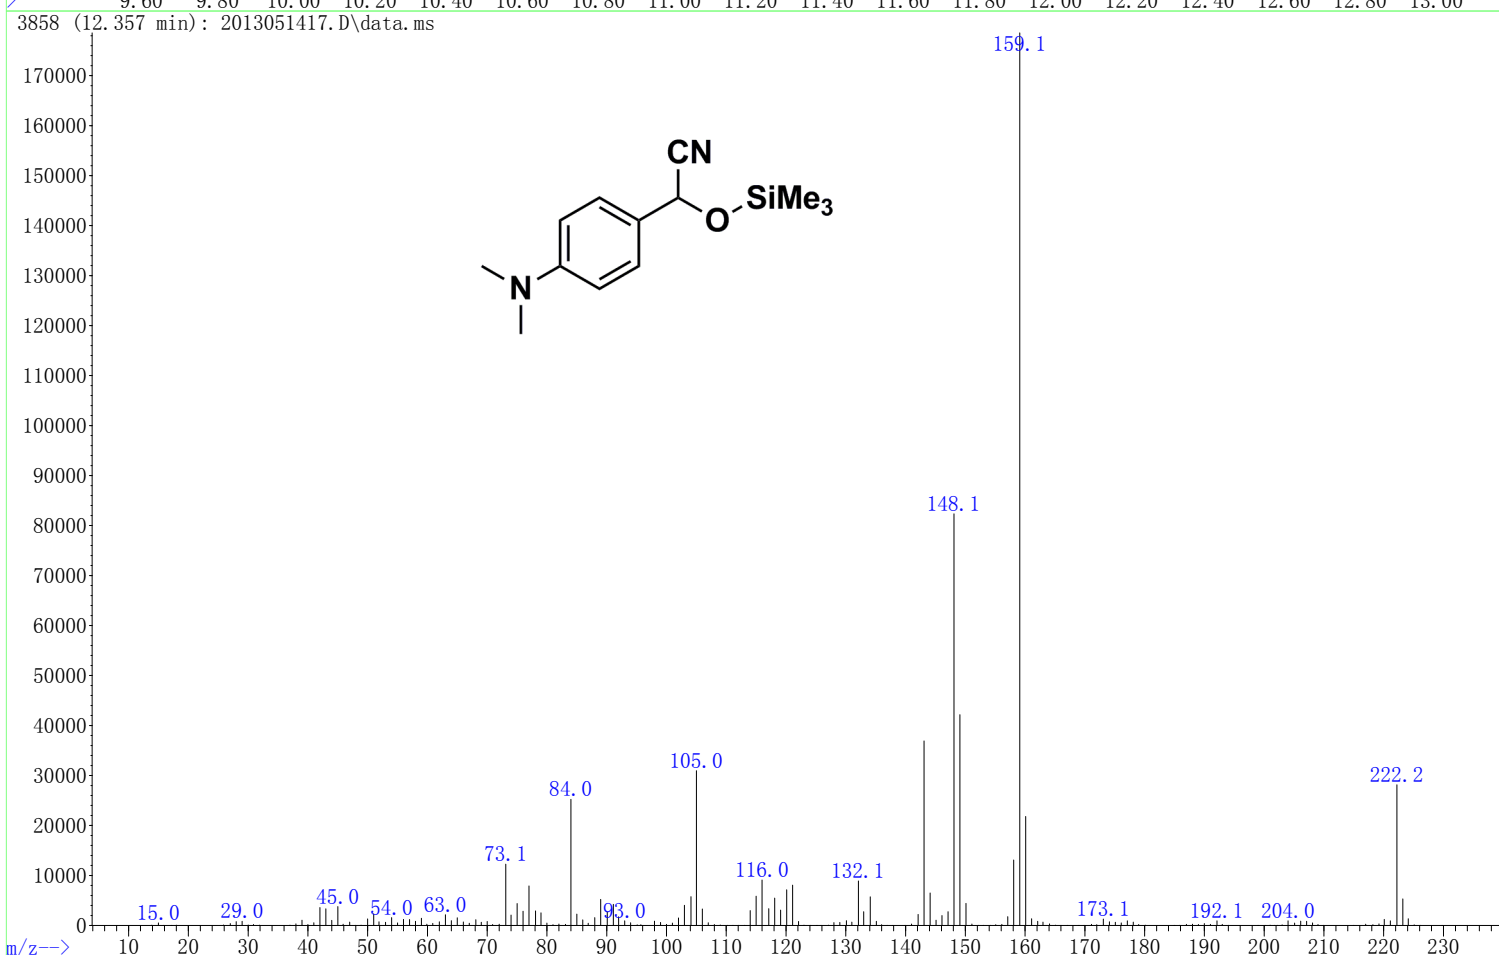

GC-MS spectra (Table 1, entry 5)

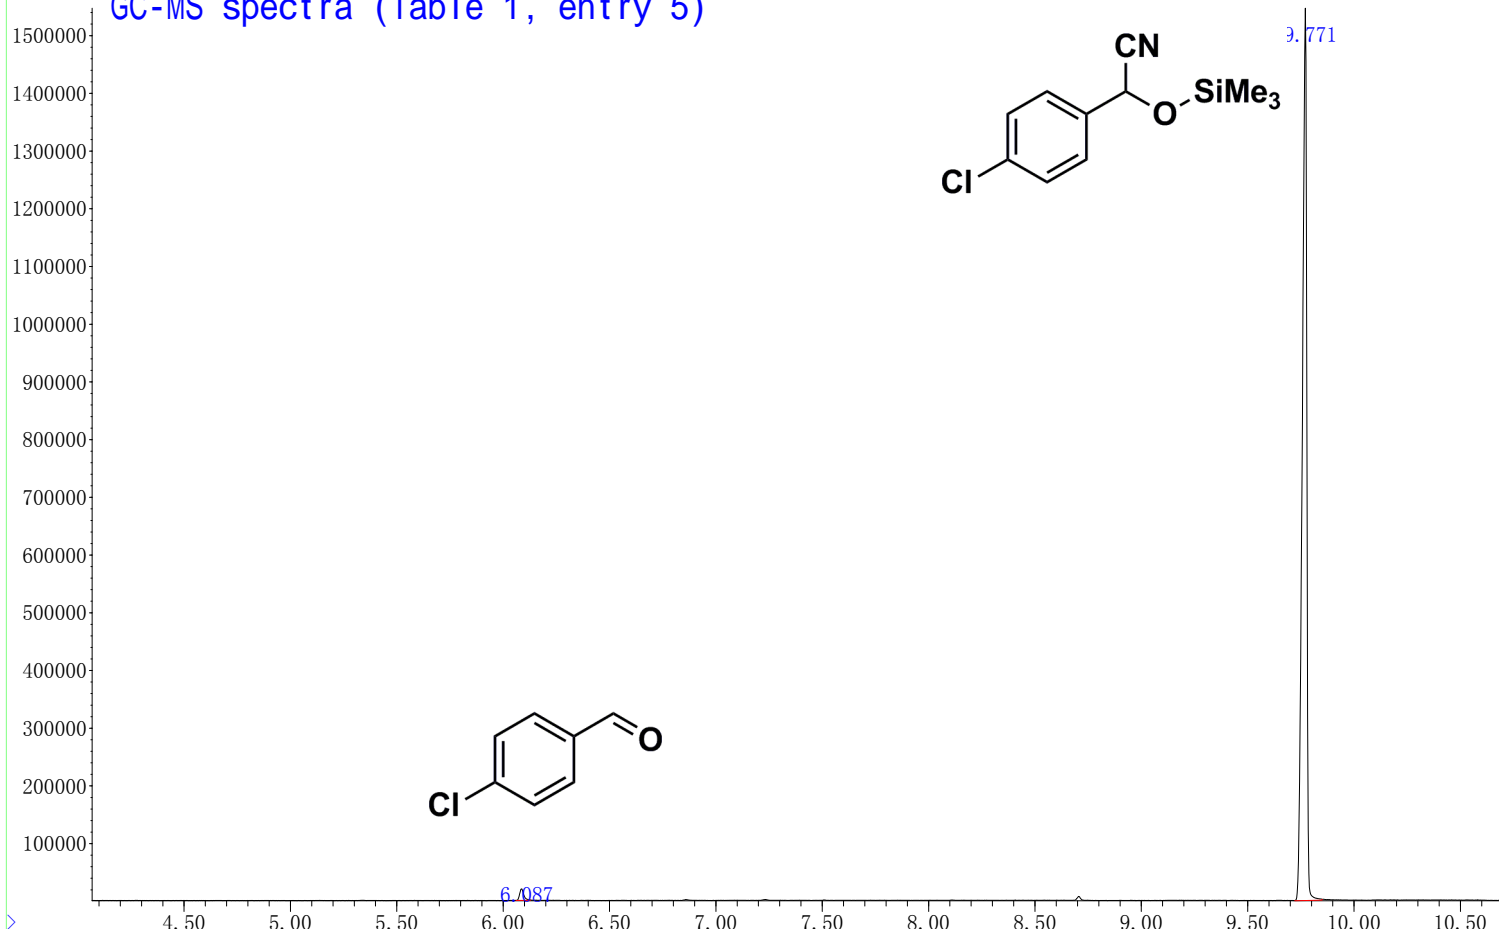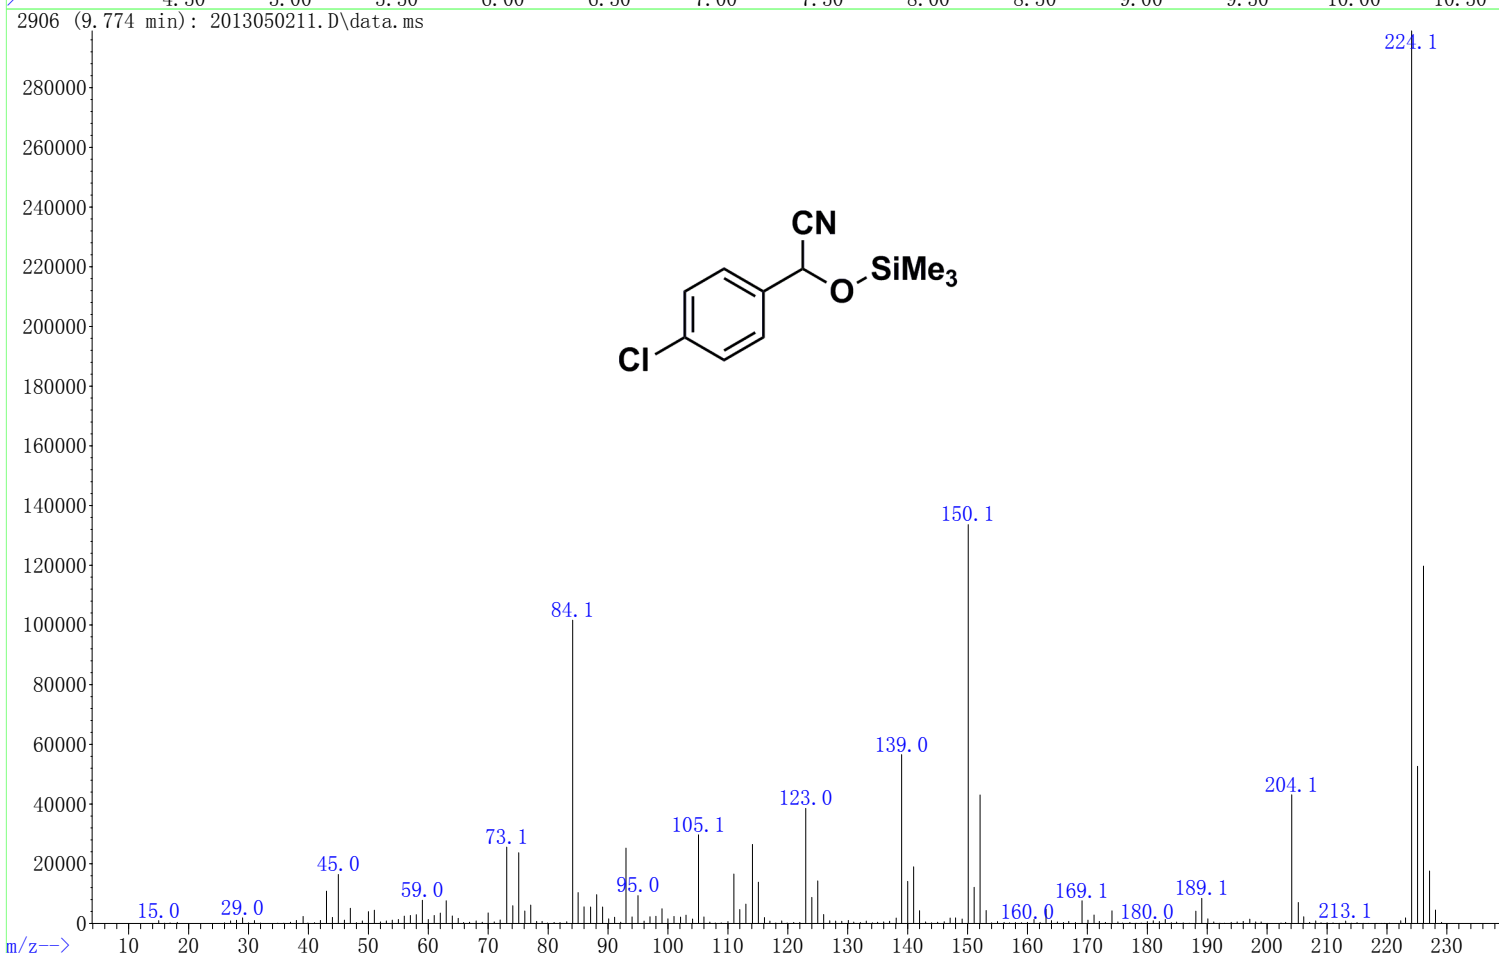

GC-MS spectra (Table 1, entry 6)

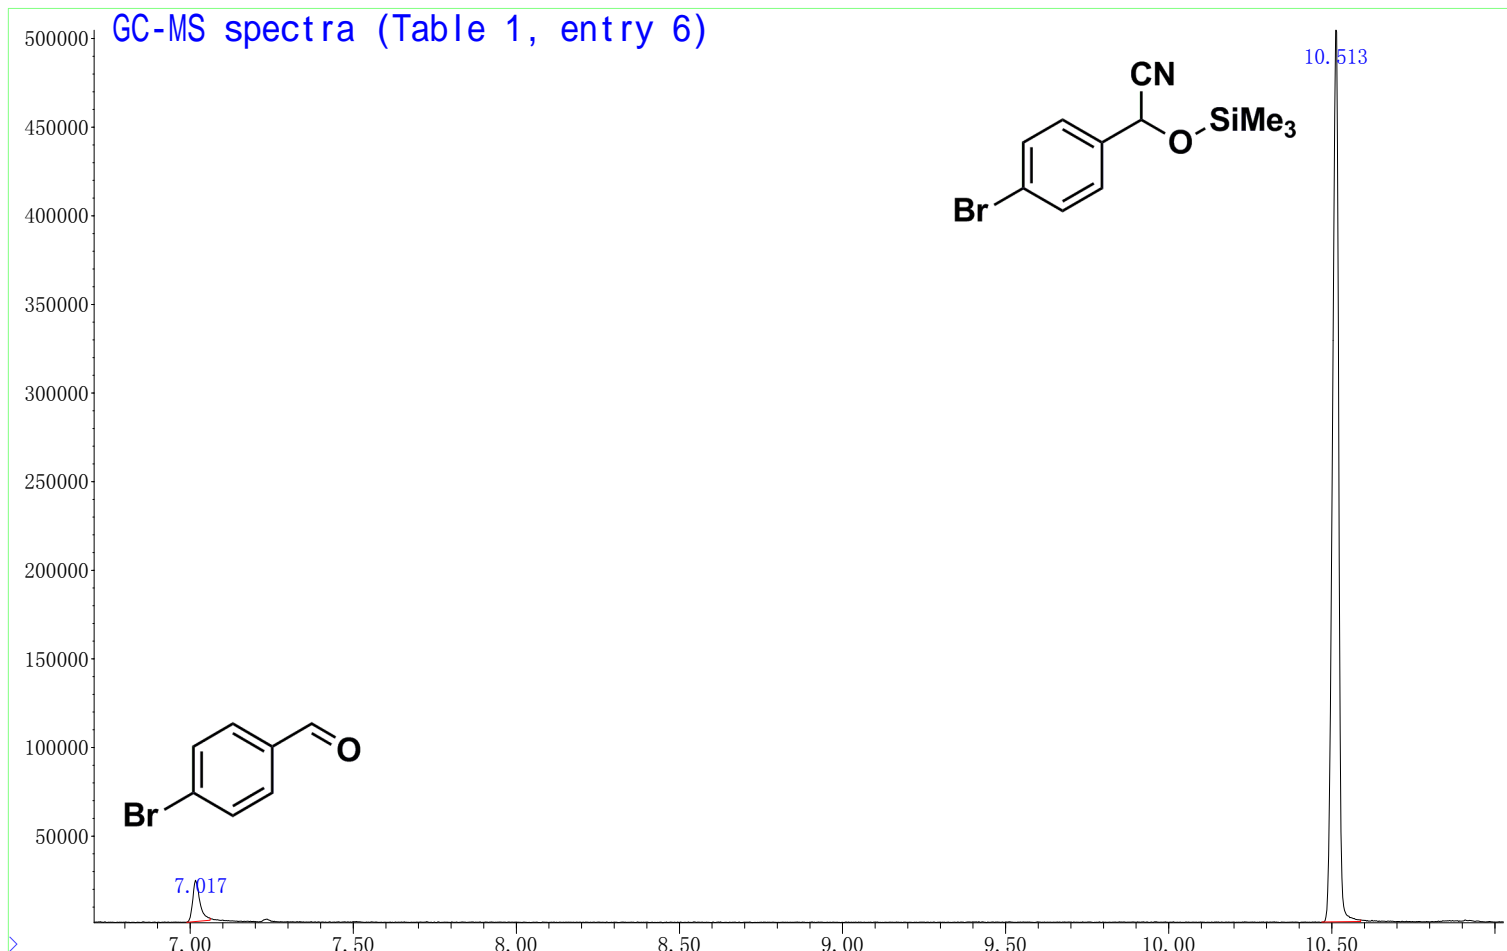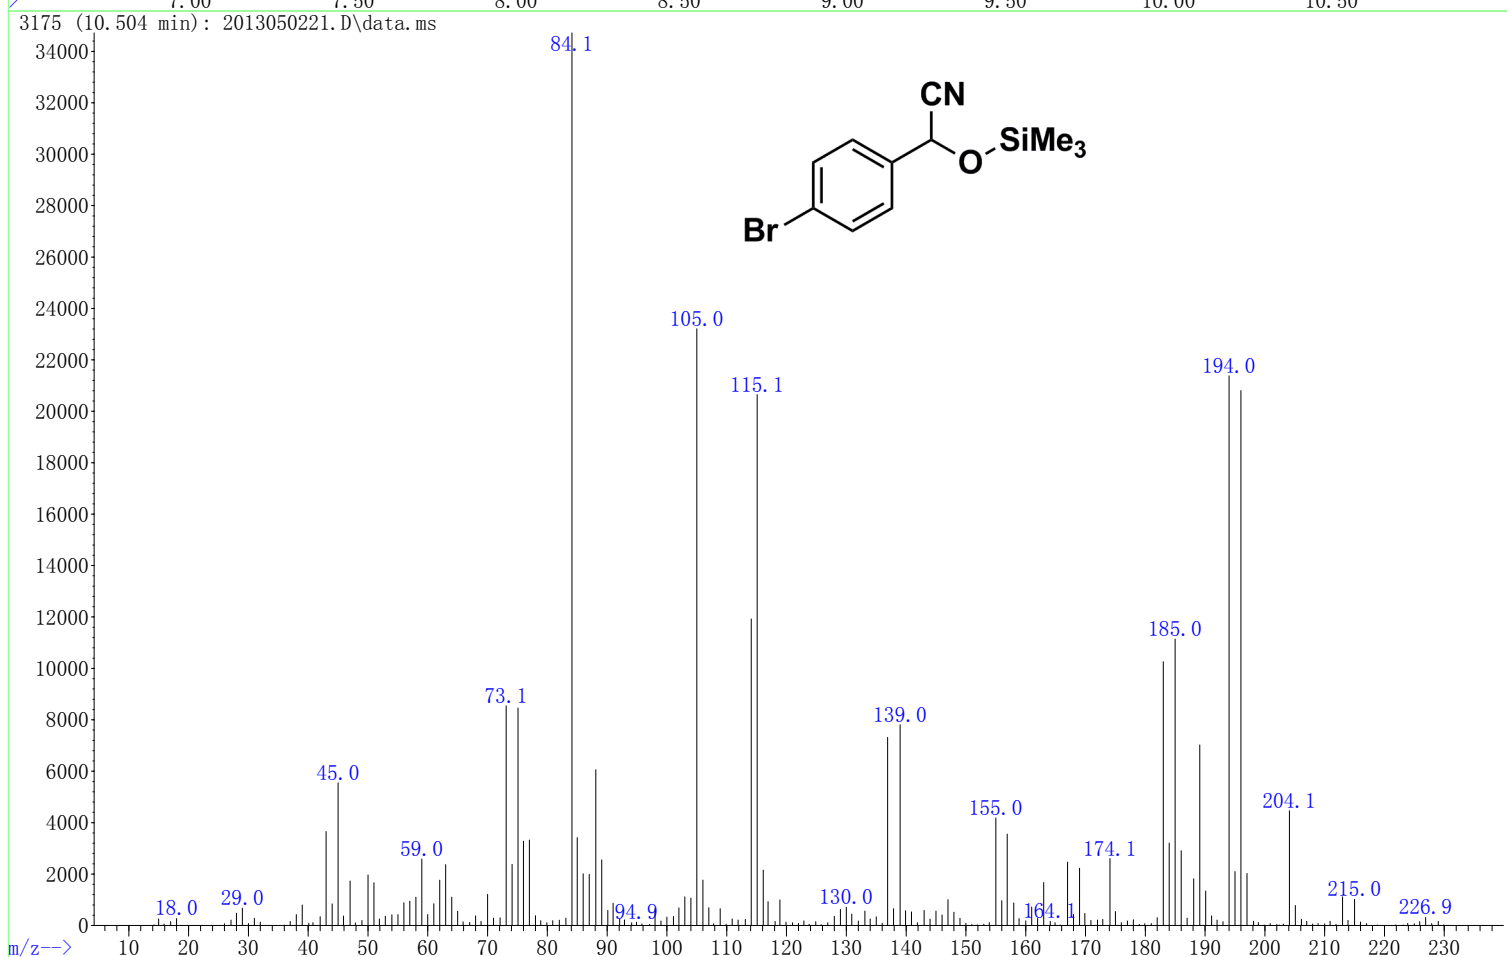

# GC-MS spectra (Table 1, entry 7)

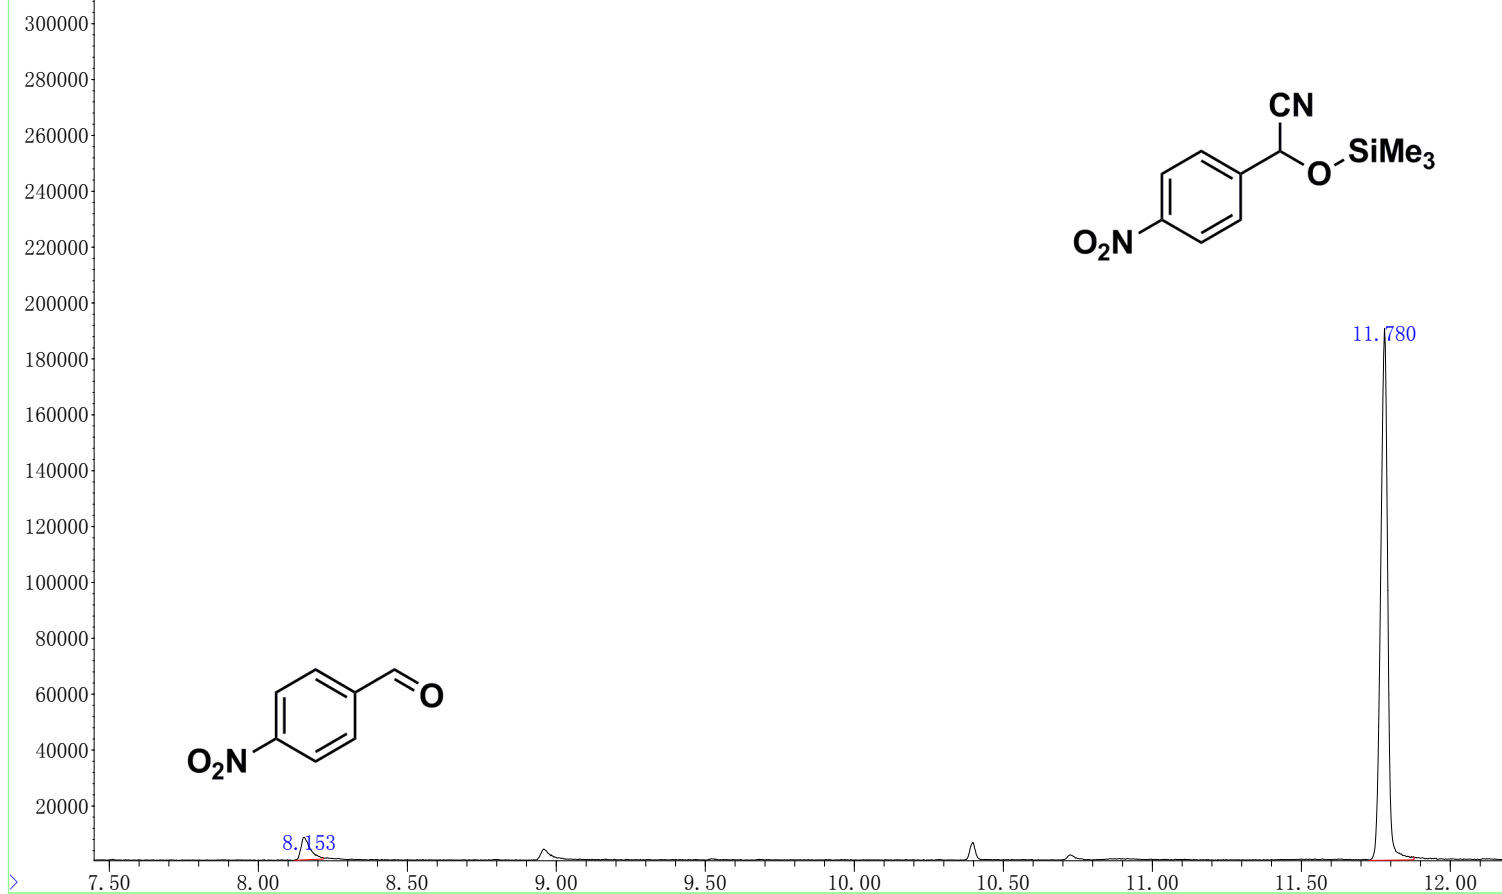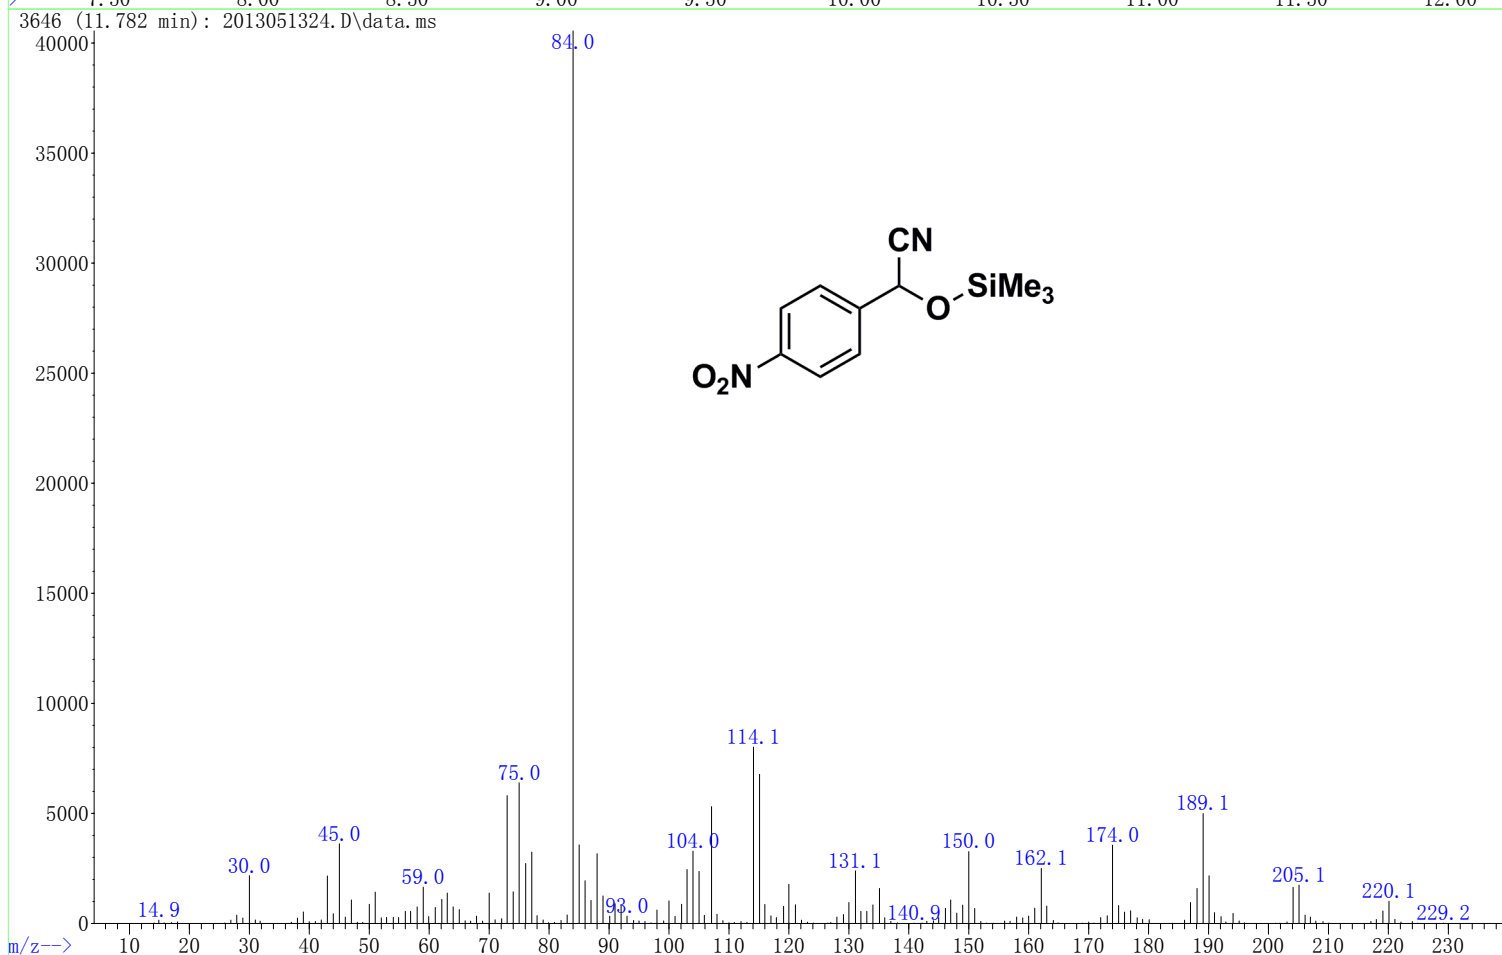

GC-MS spectra (Table 1, entry 8)

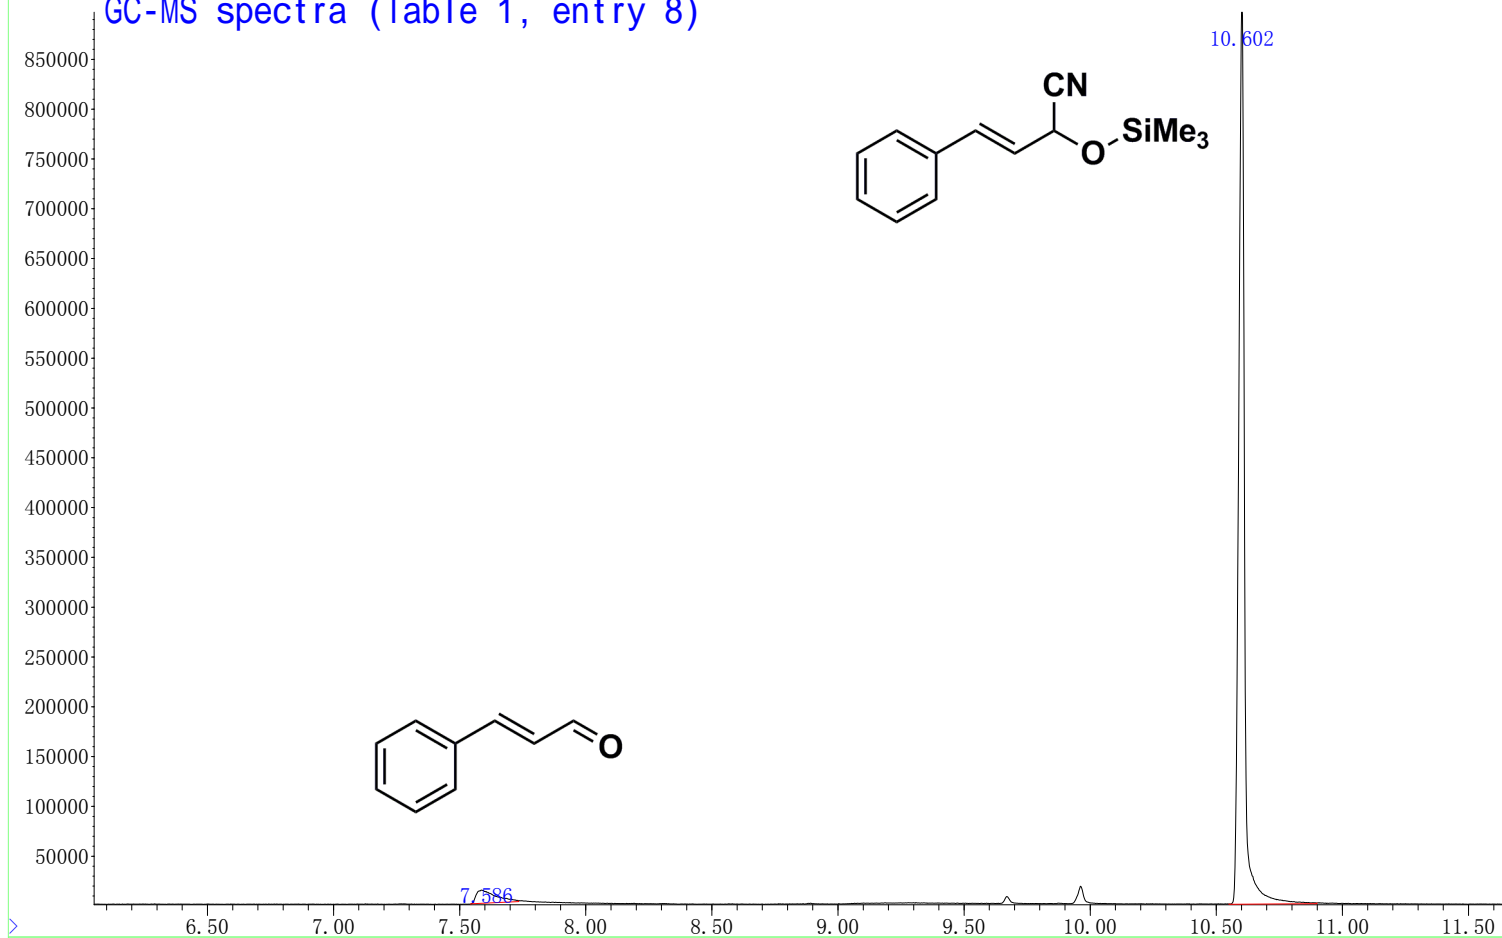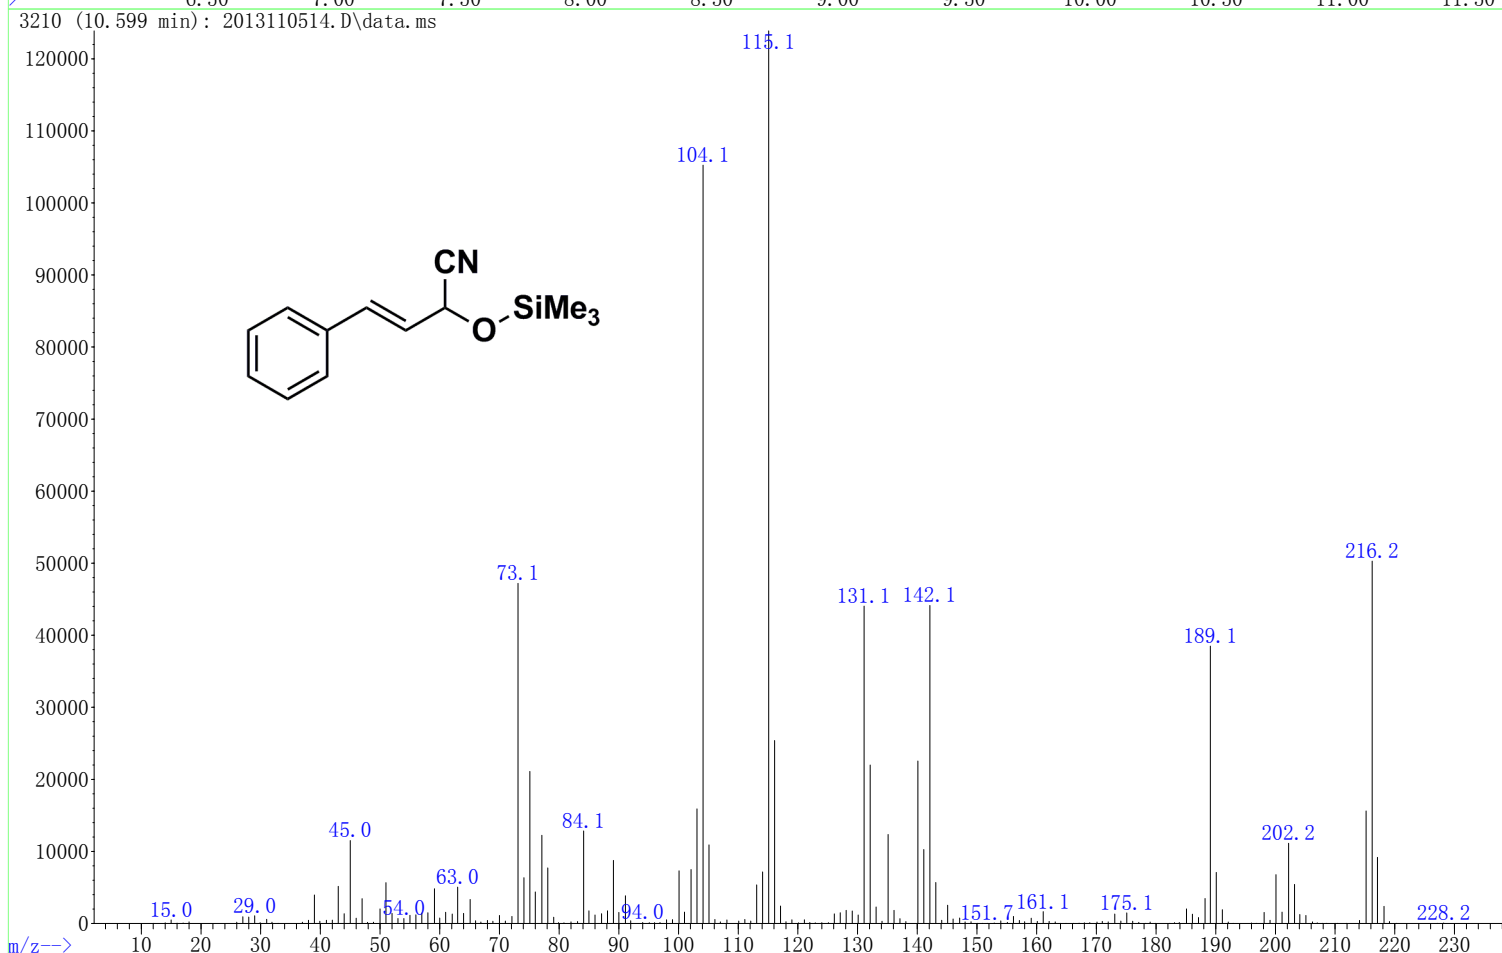

GC-MS spectra (Table 1, entry 9)

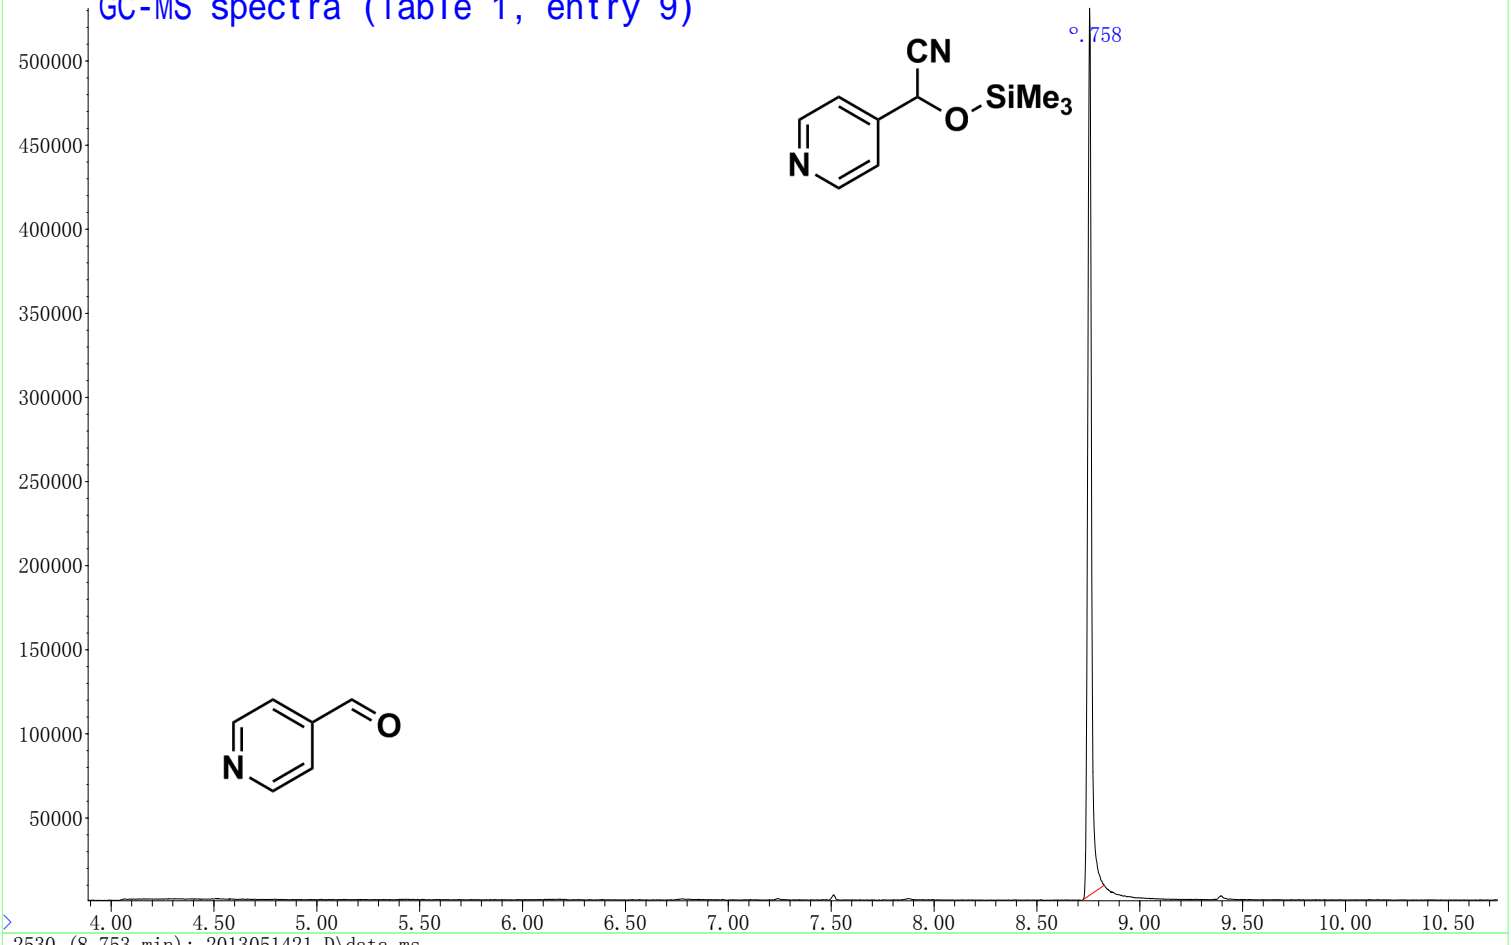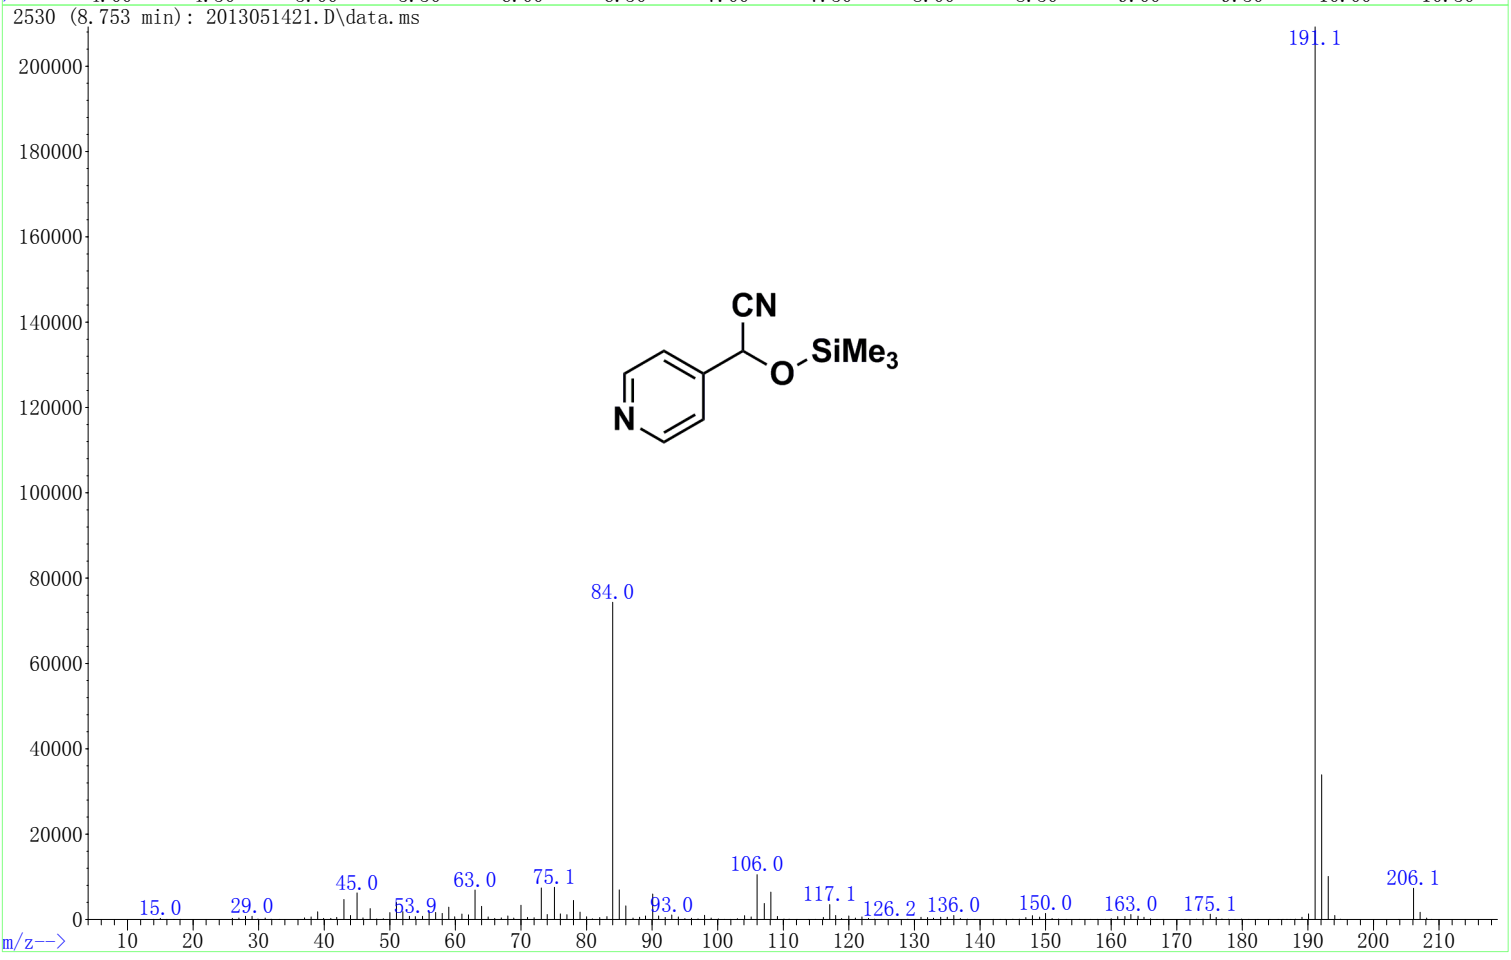



GC-MS spectra (Table 1, entry 10)

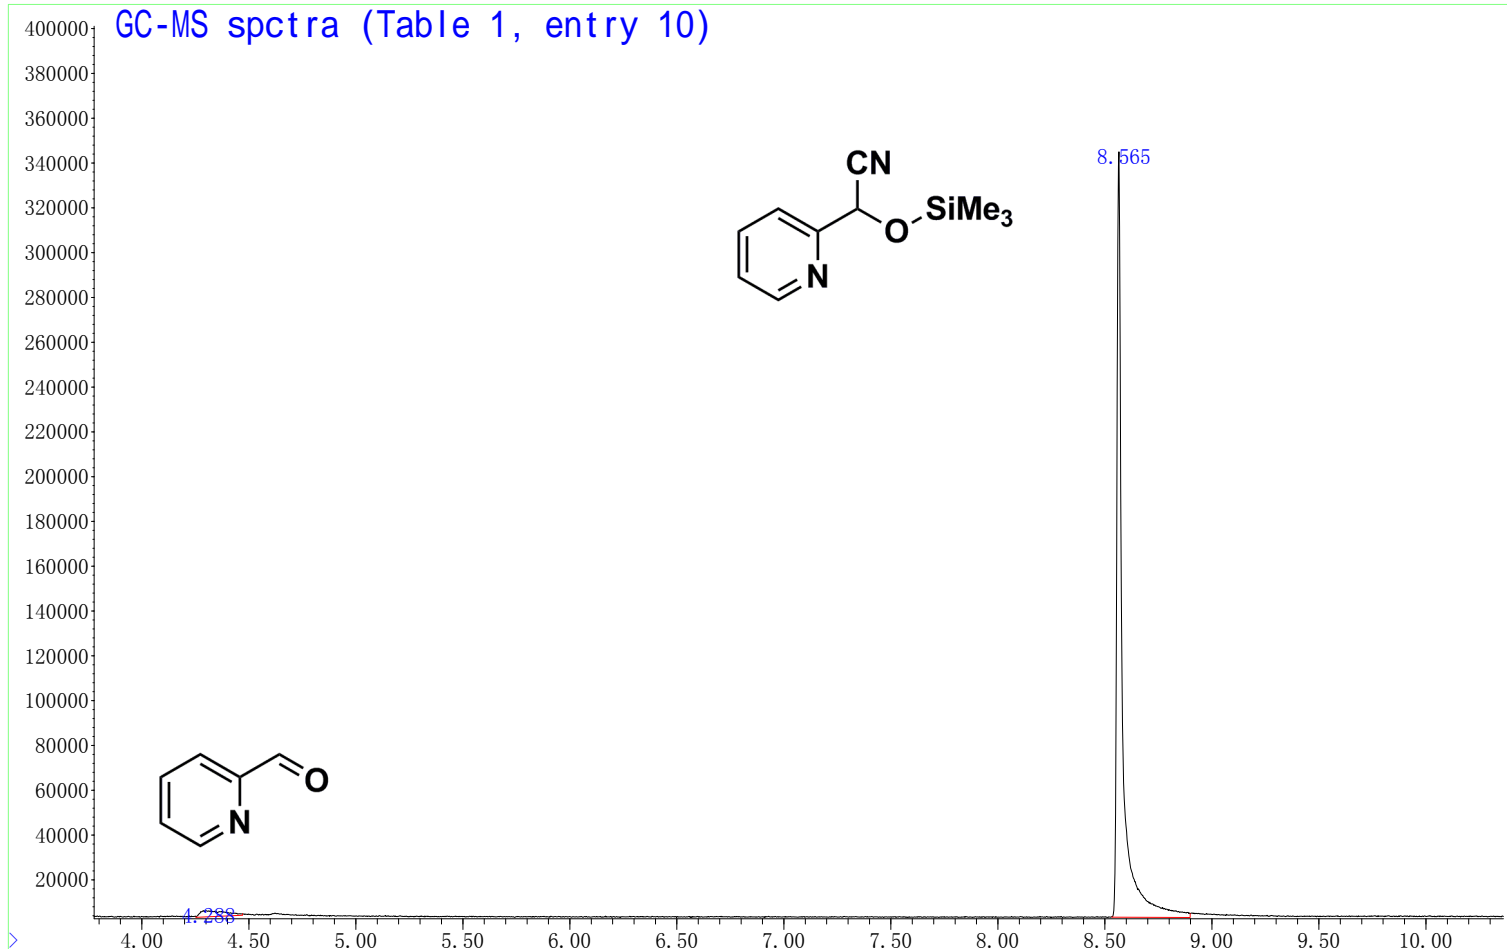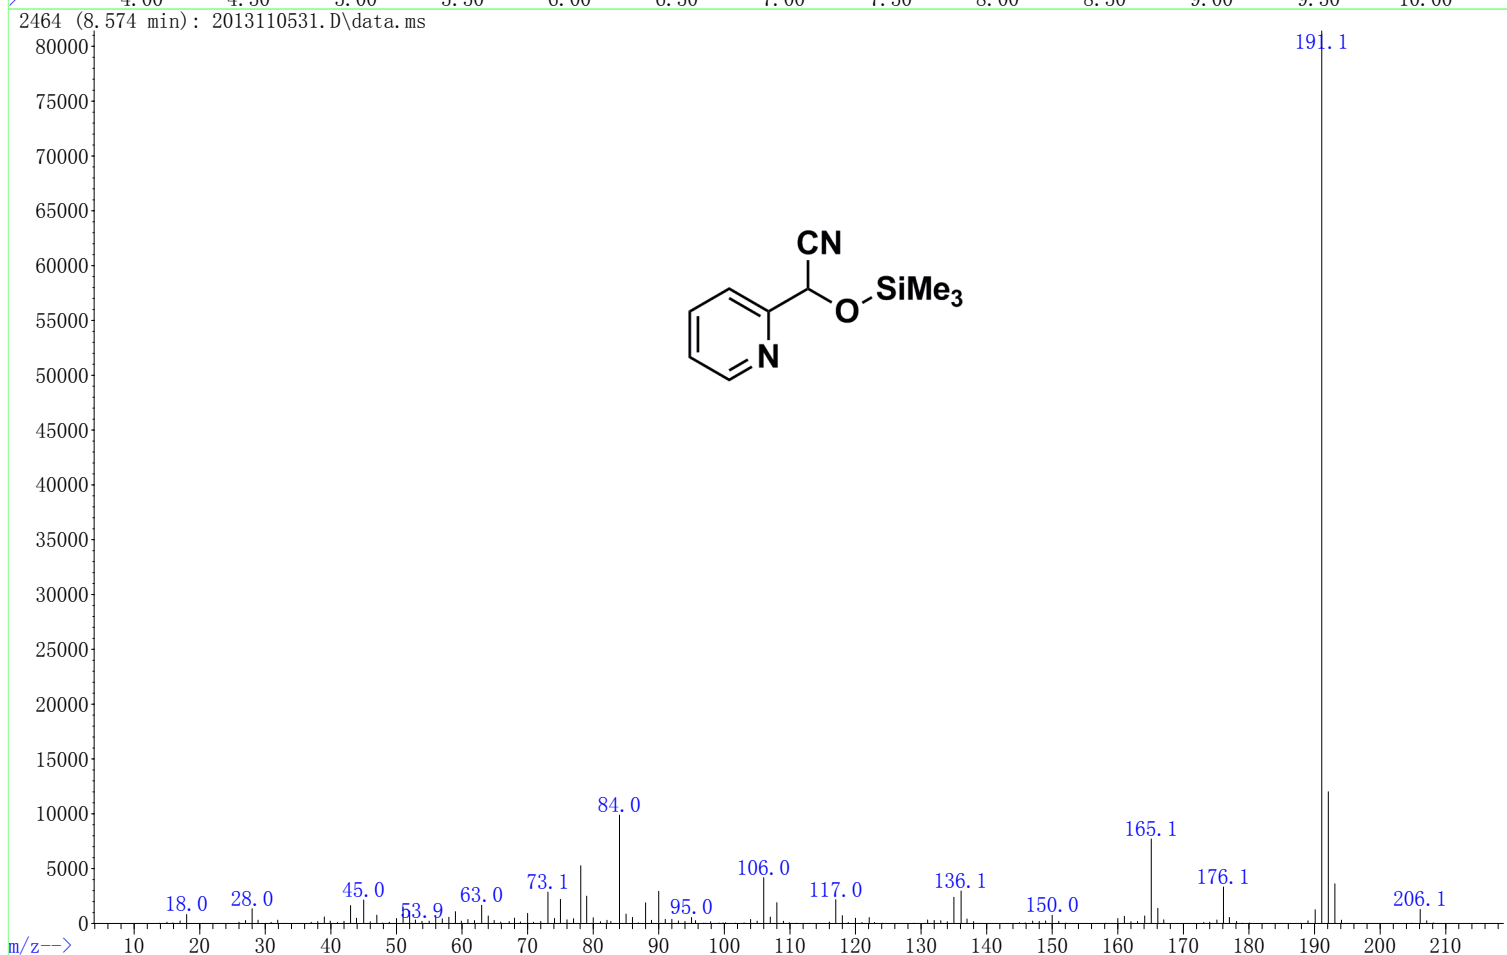

GC-MS spectra (Table 1, entry 11)

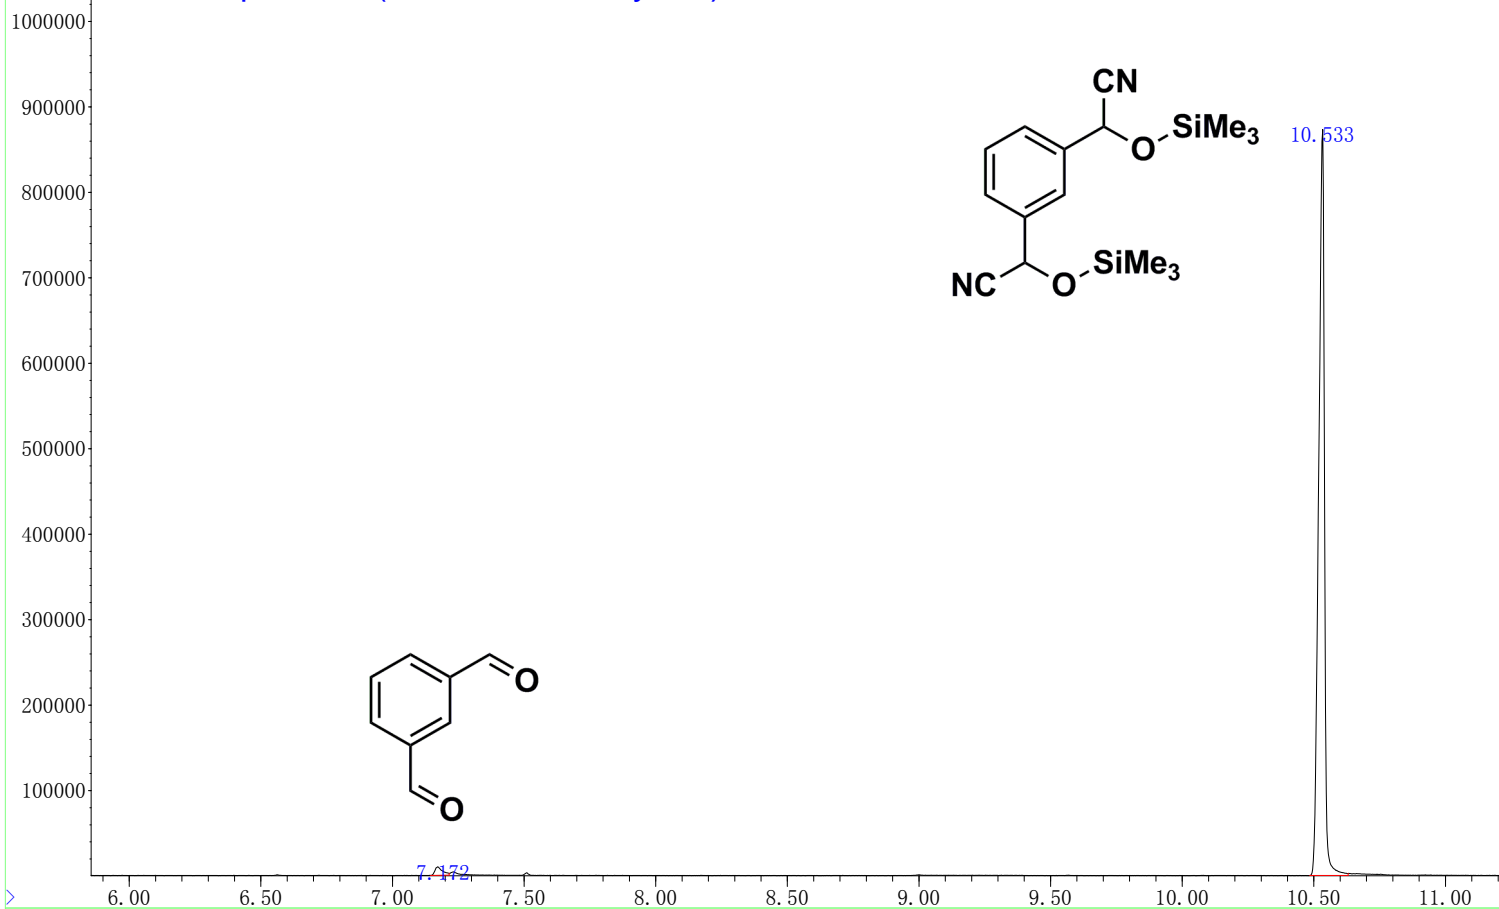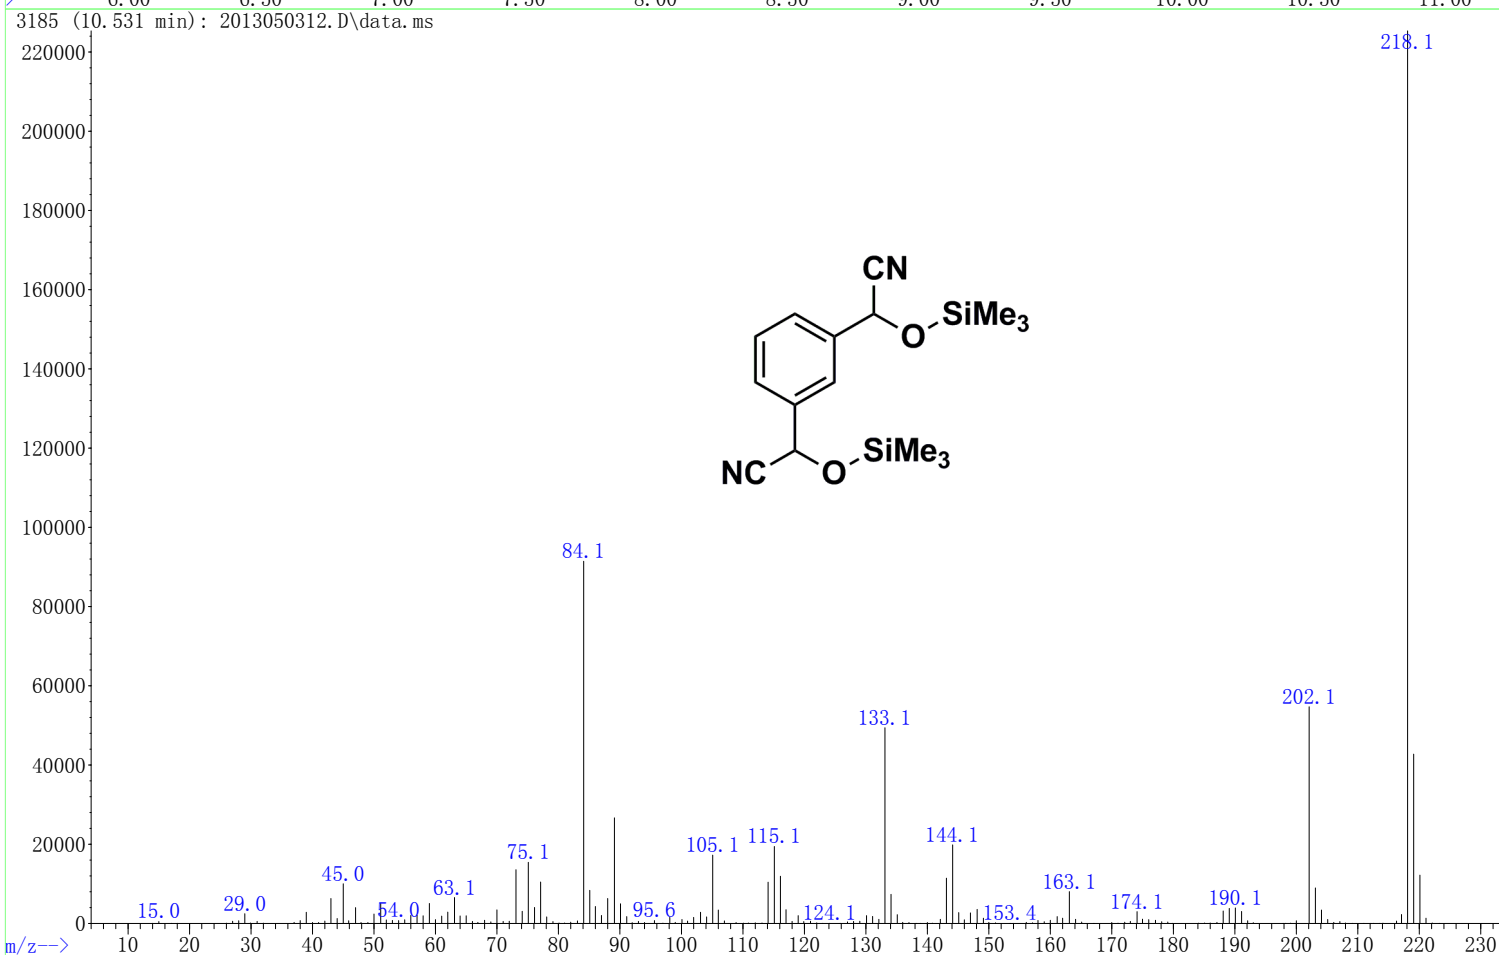

GC-MS spectra (Table 1, entry 12)

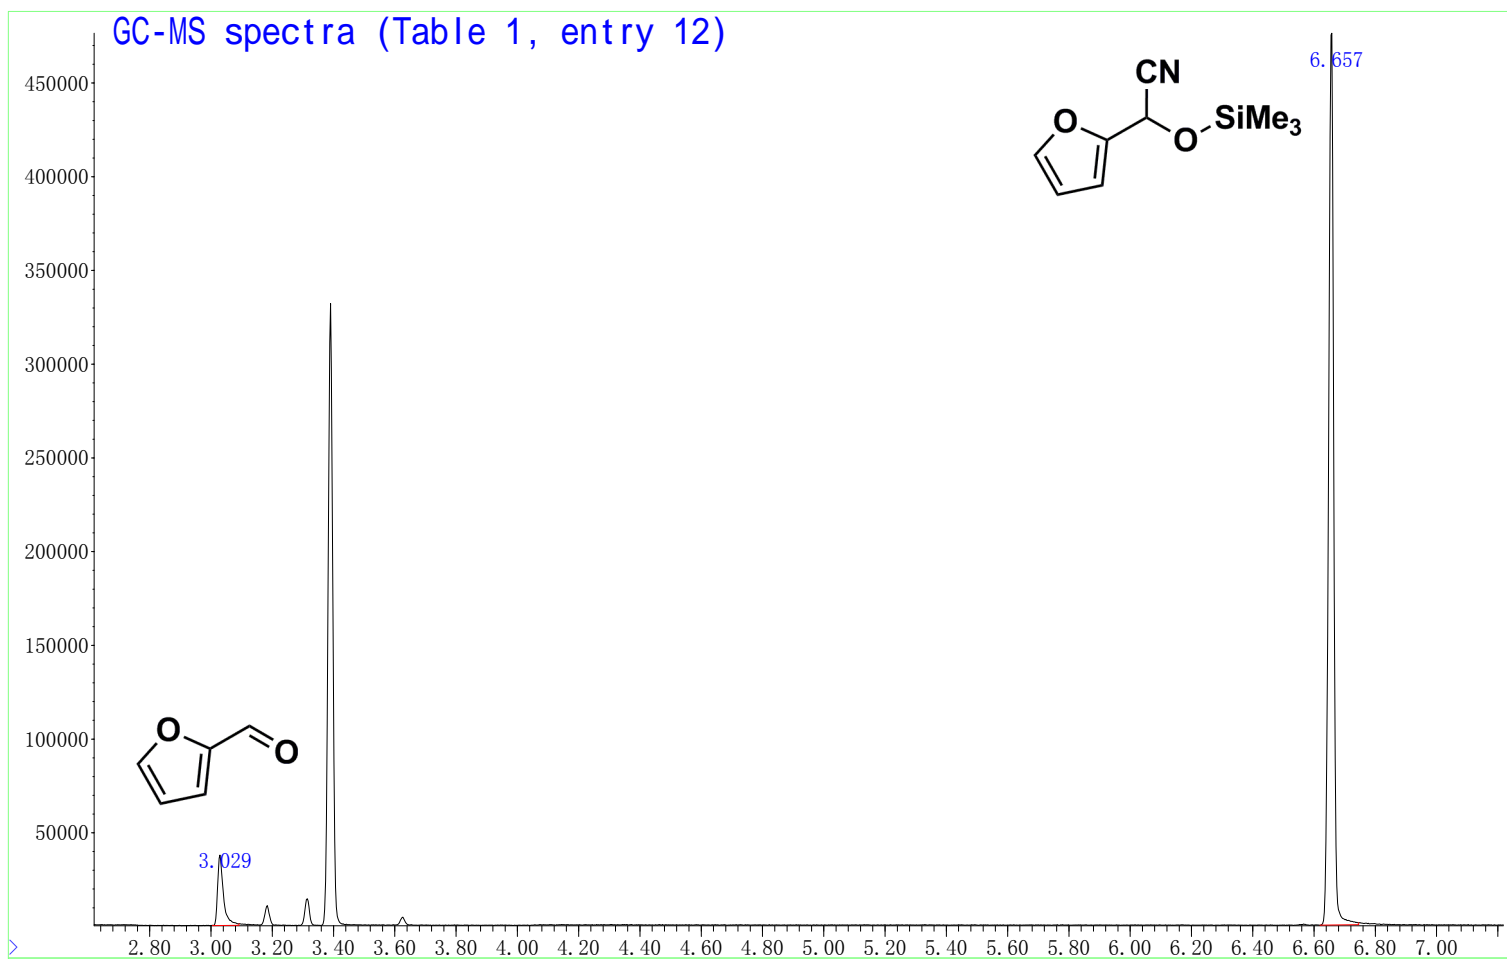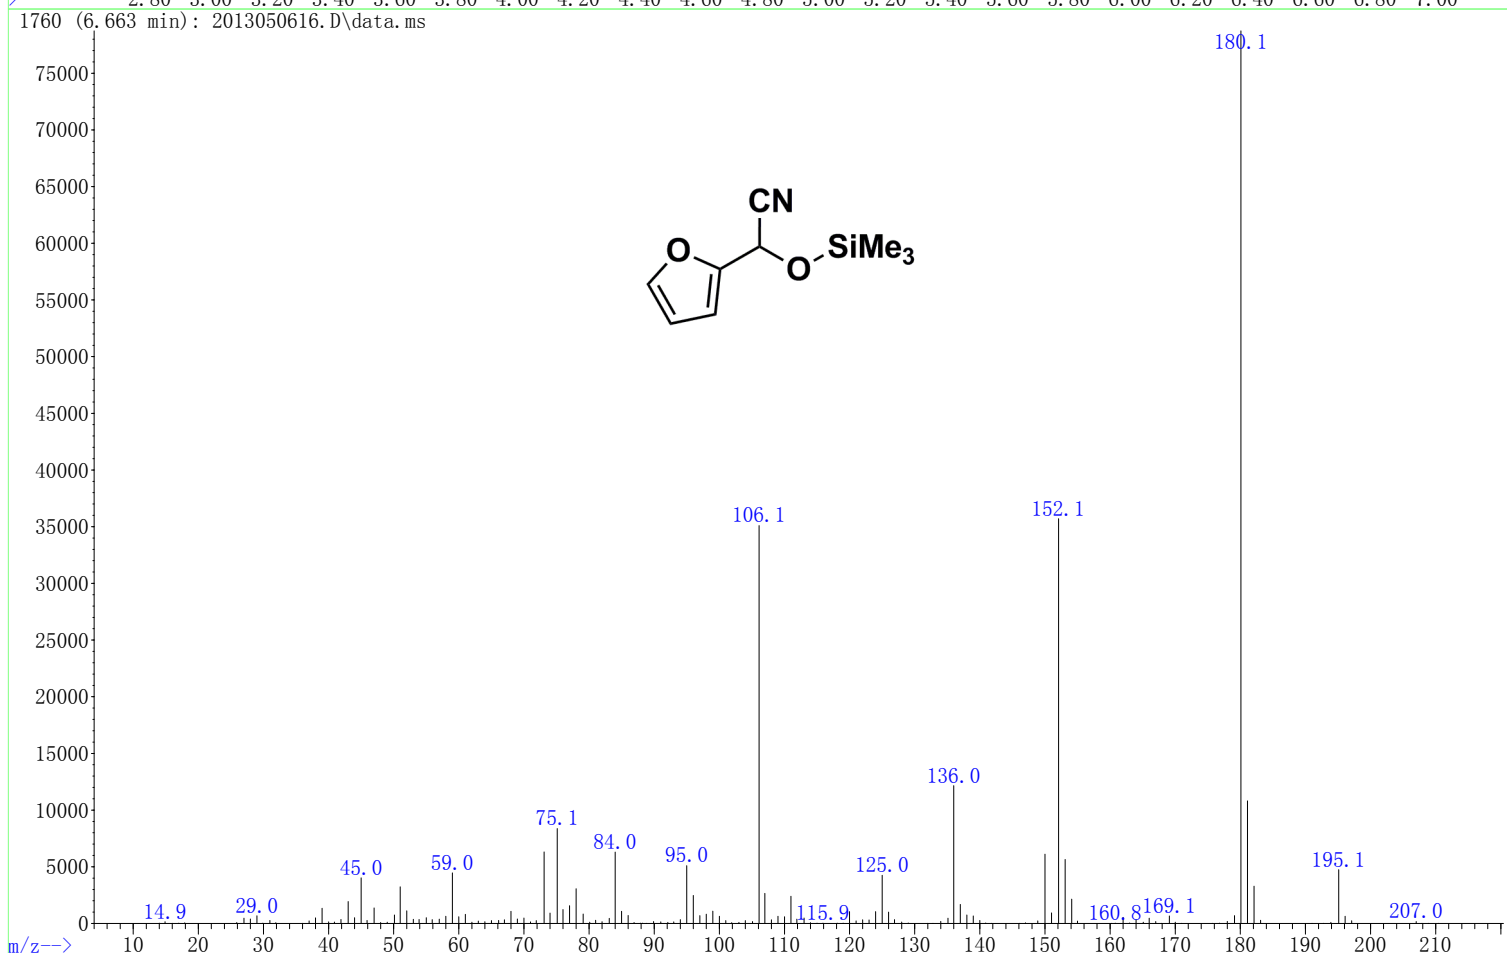

GC-MS spectra (Table 1, entry 13)

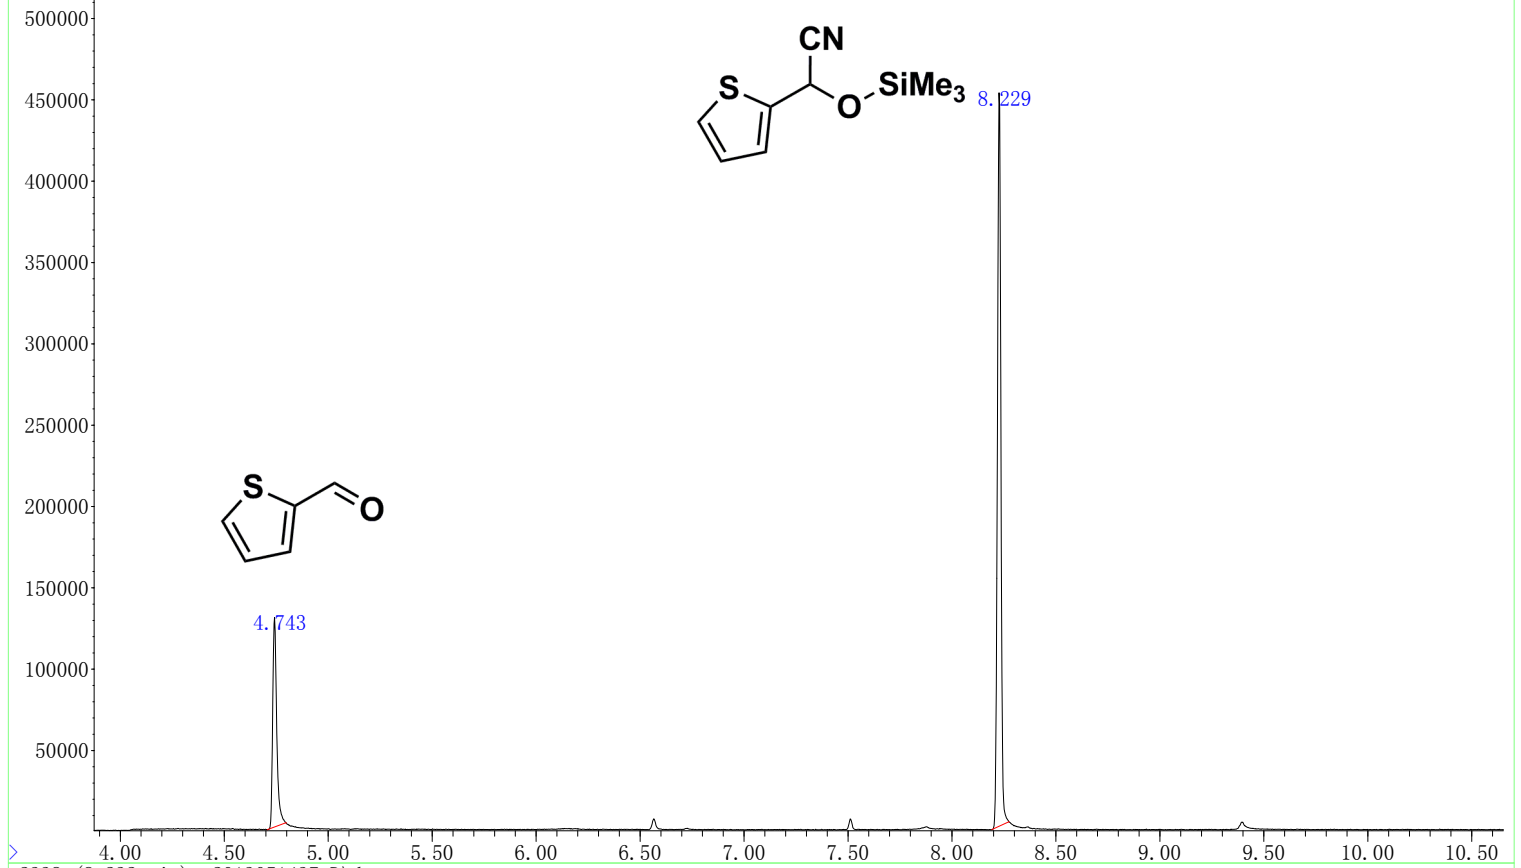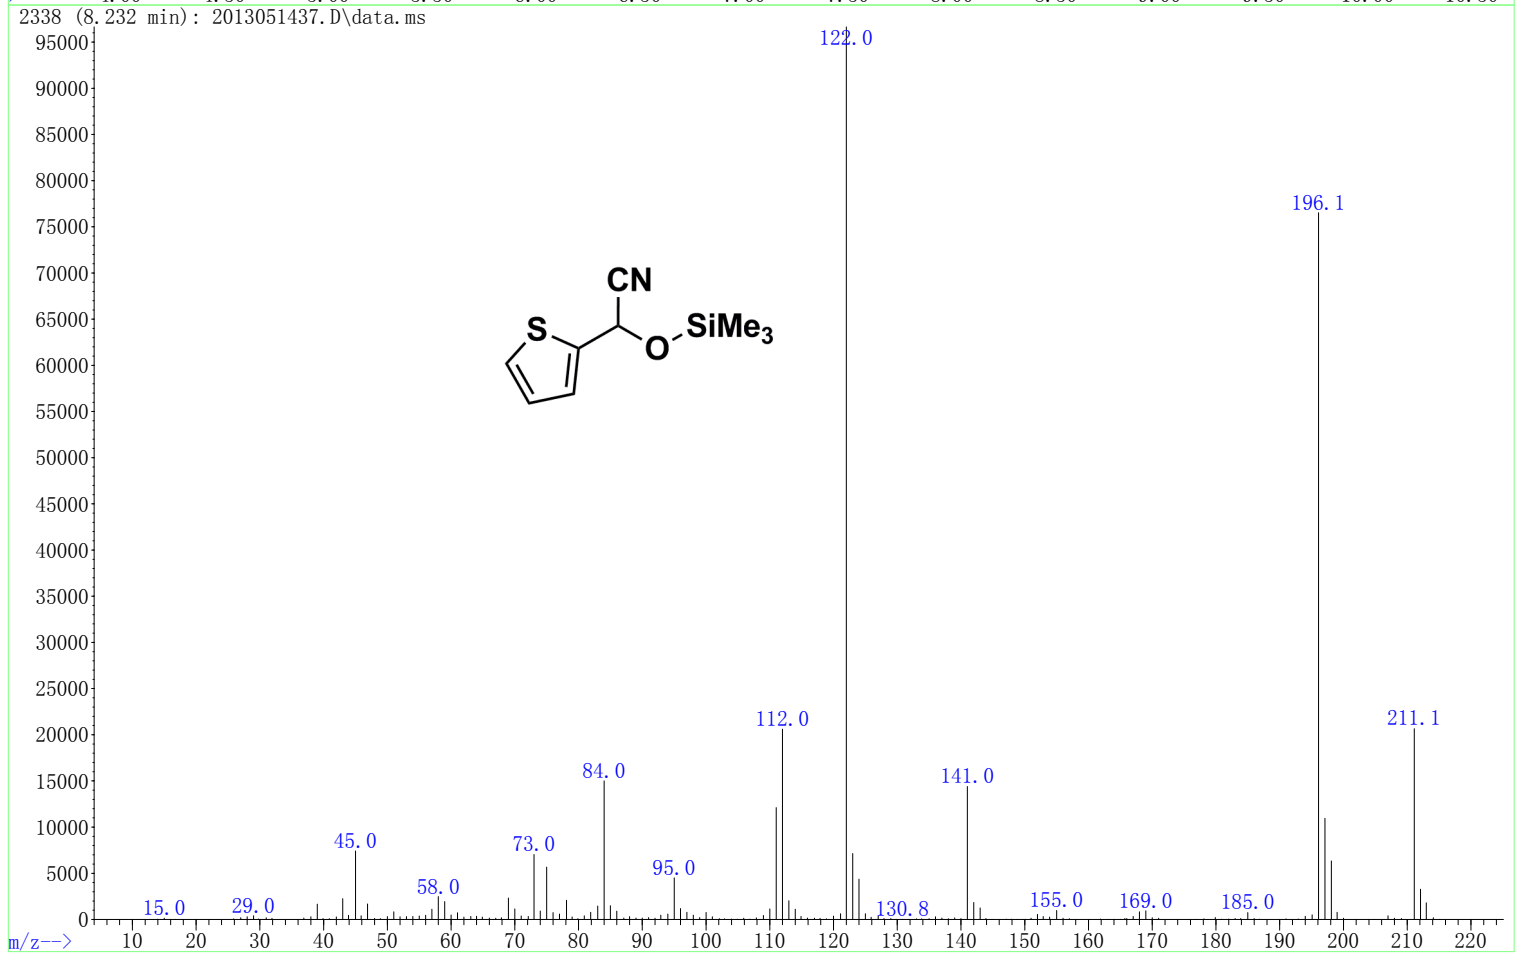

GC-MS spectra (Table 1, entry 14)

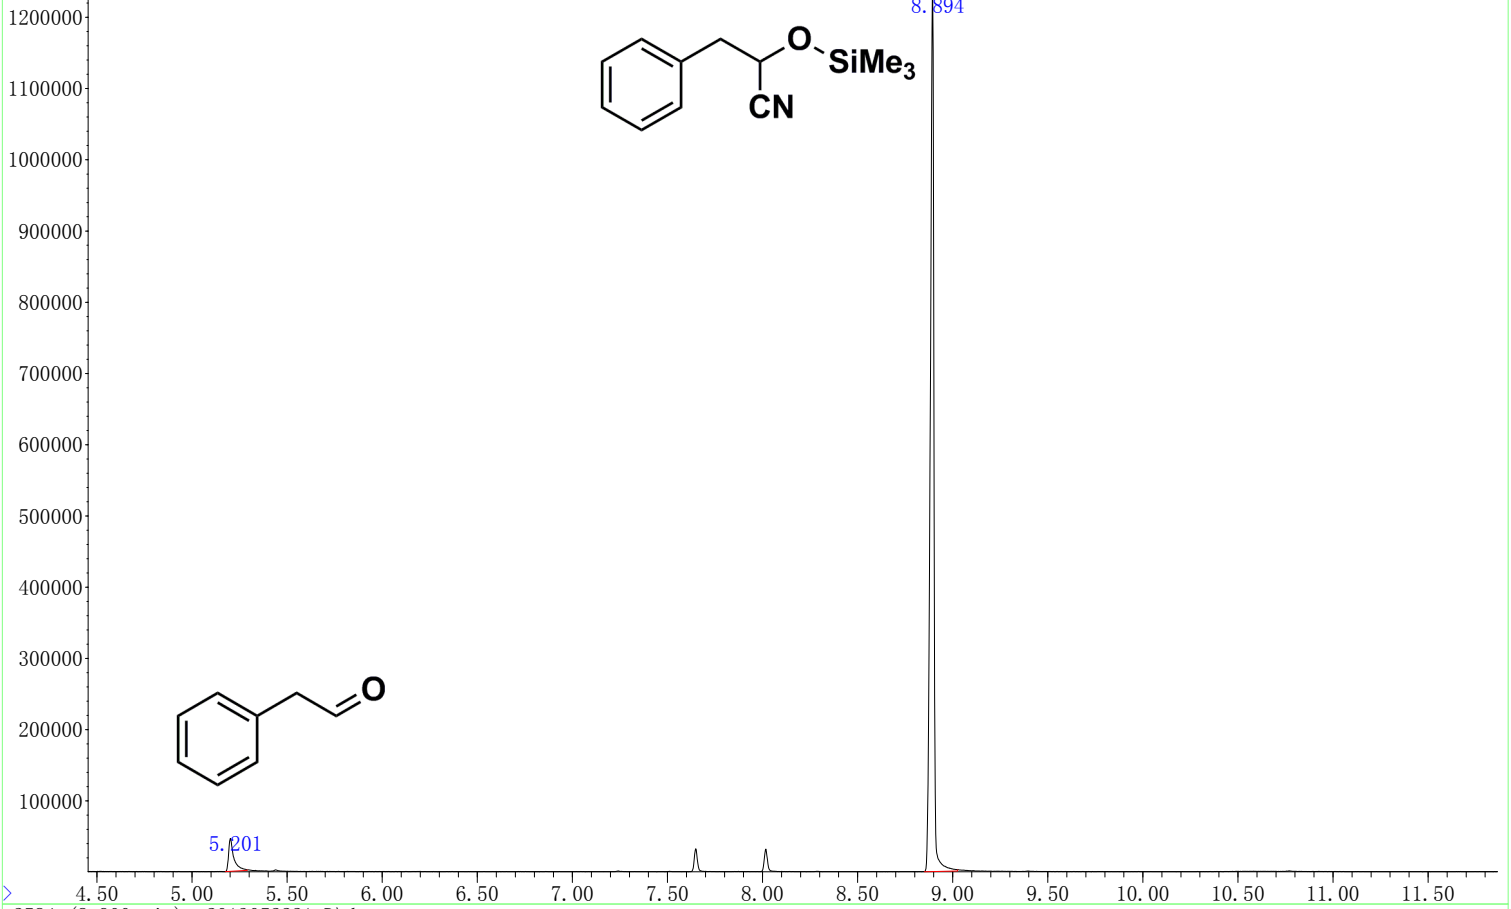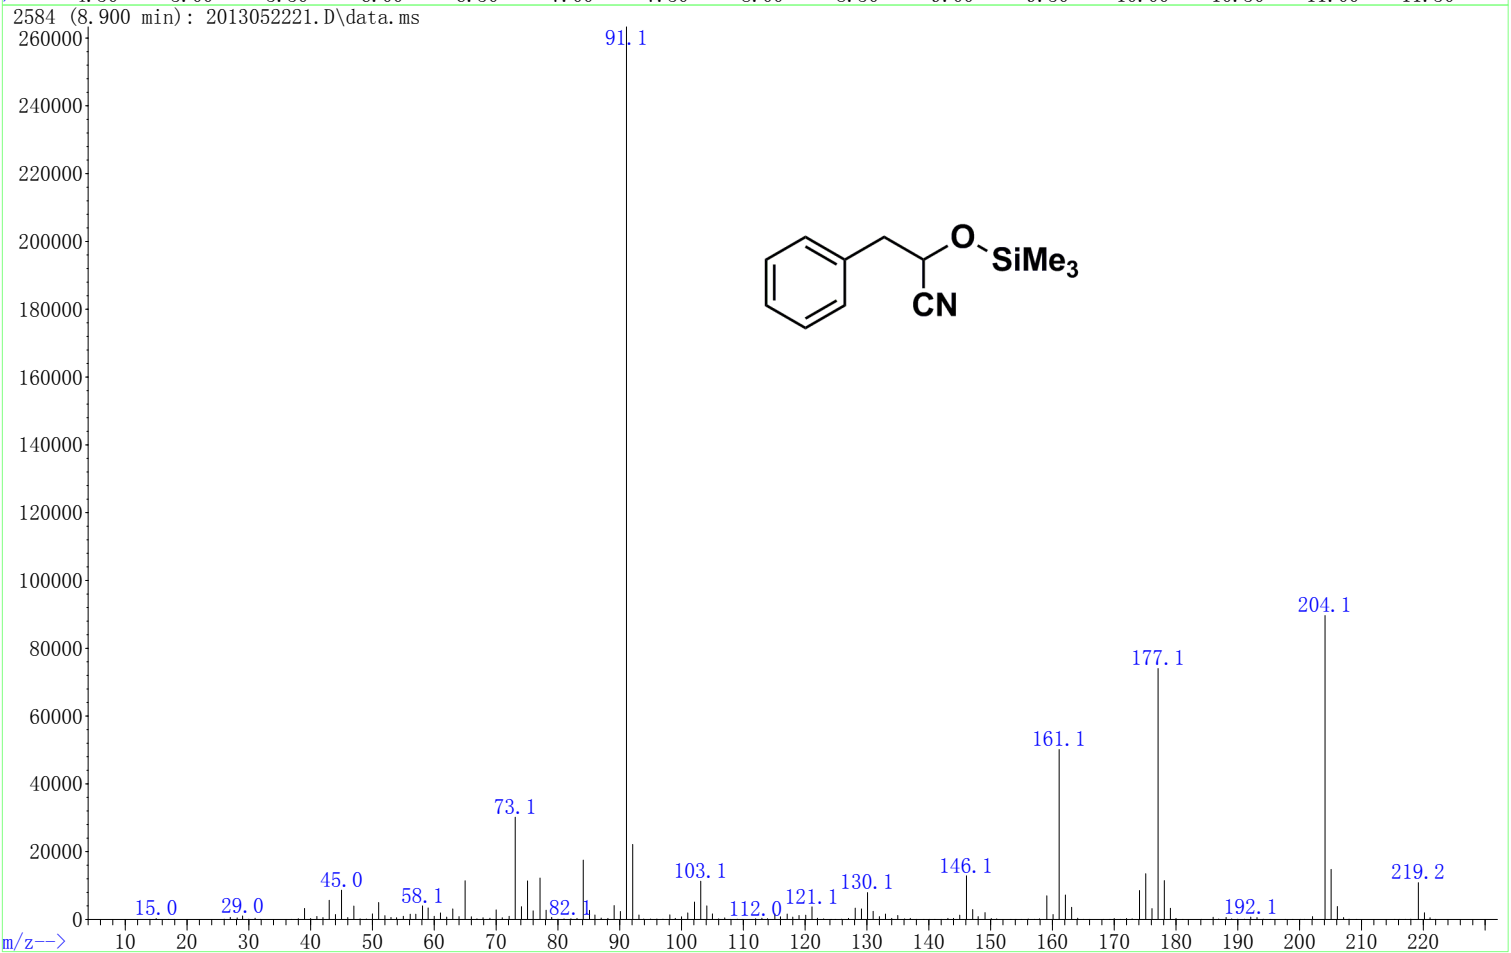

GC-MS spectra (Table 1, entry 15)

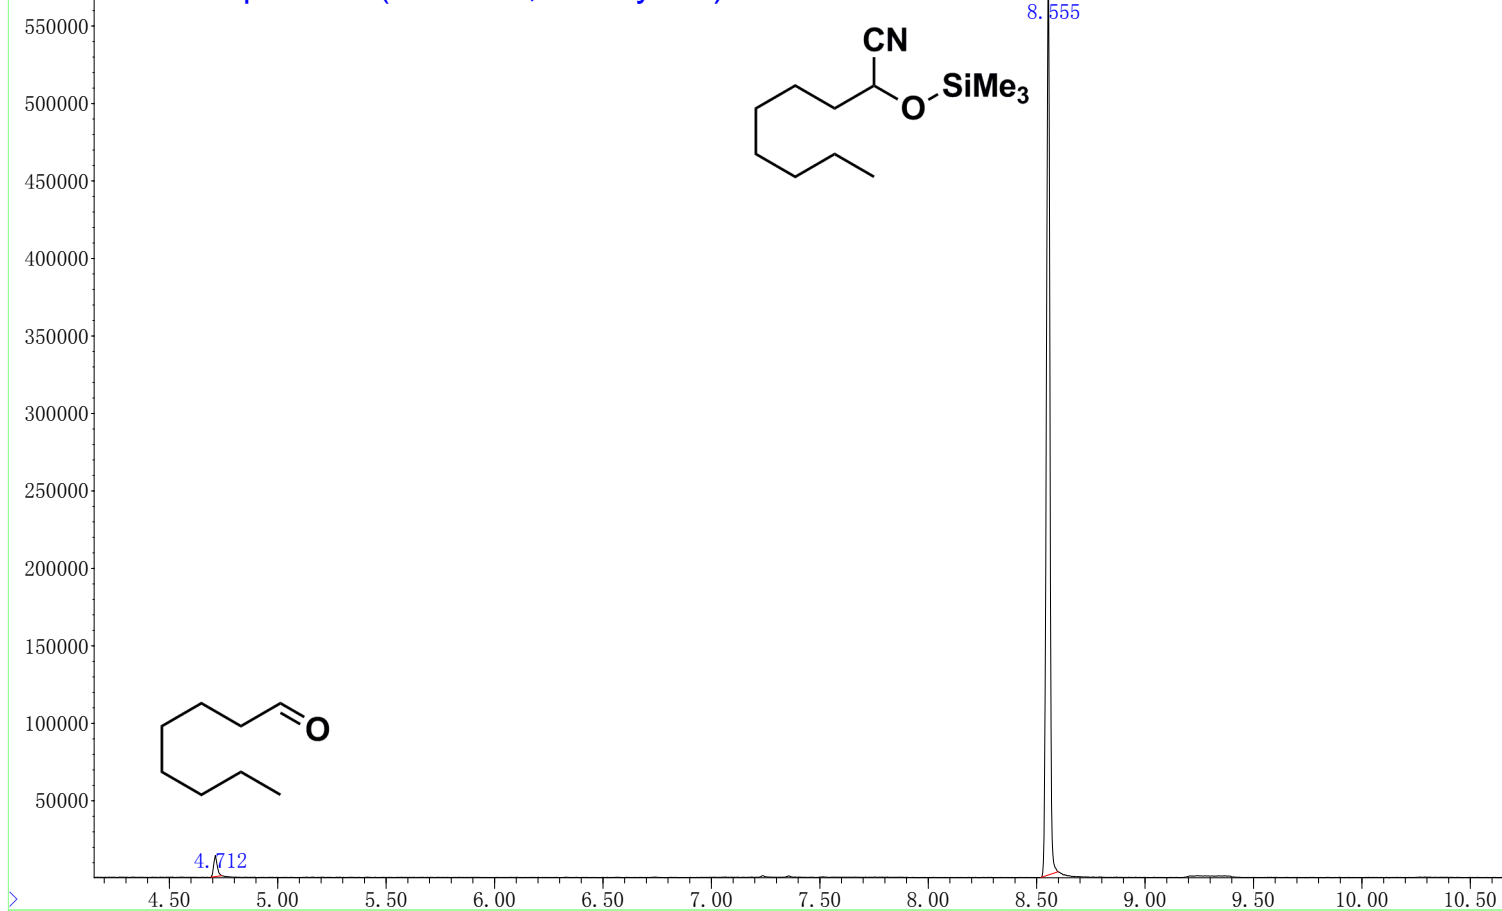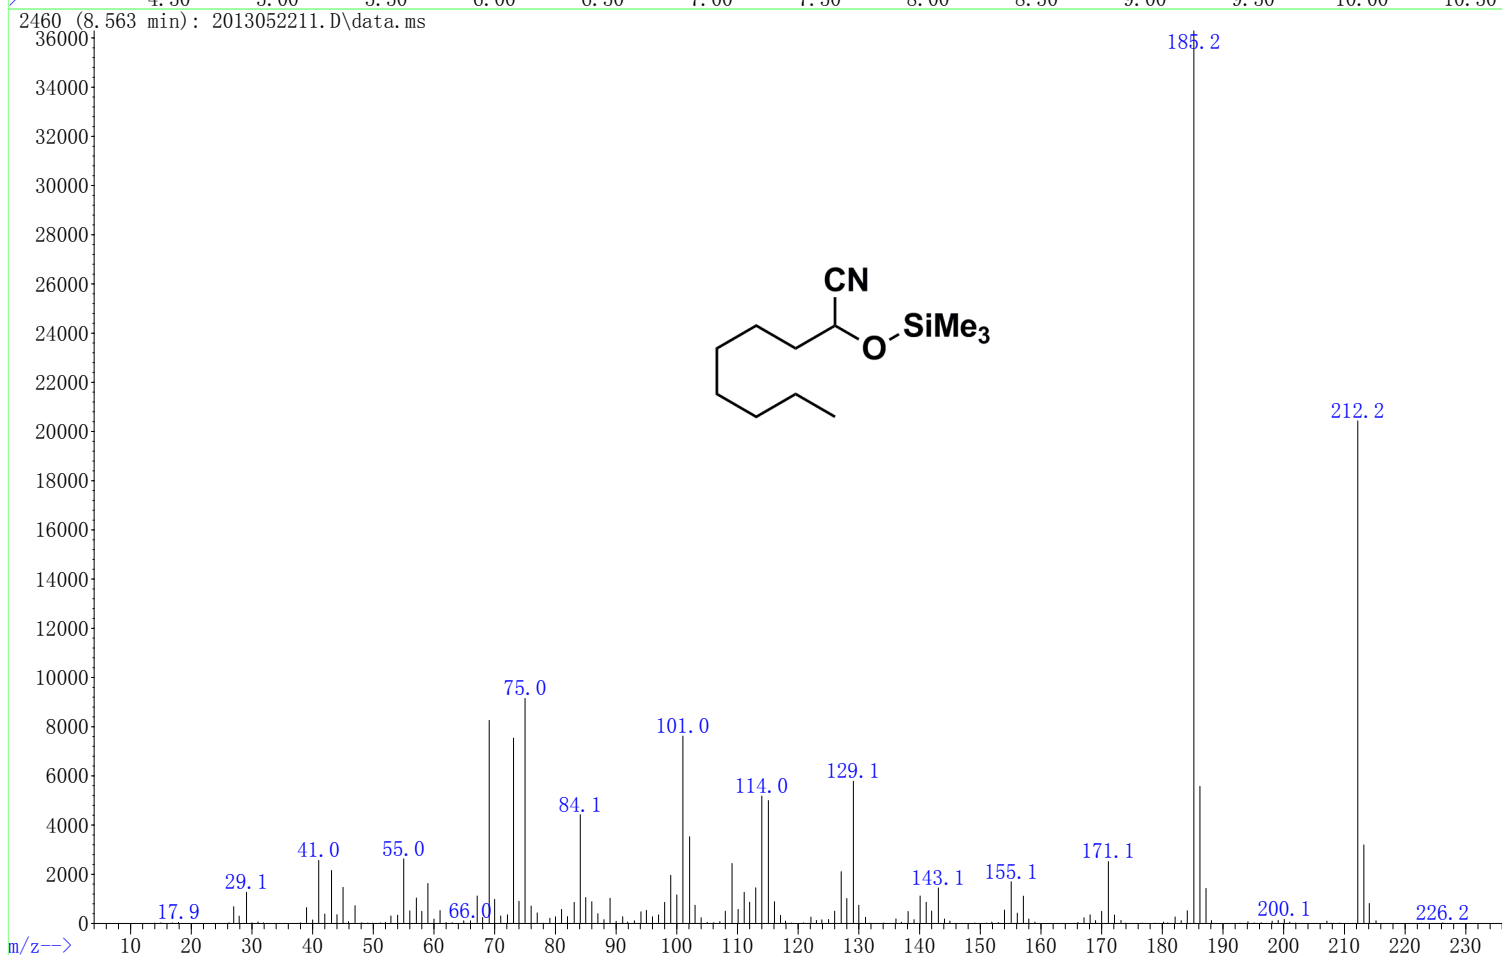

GC-MS spectra (Table 1, entry 16)

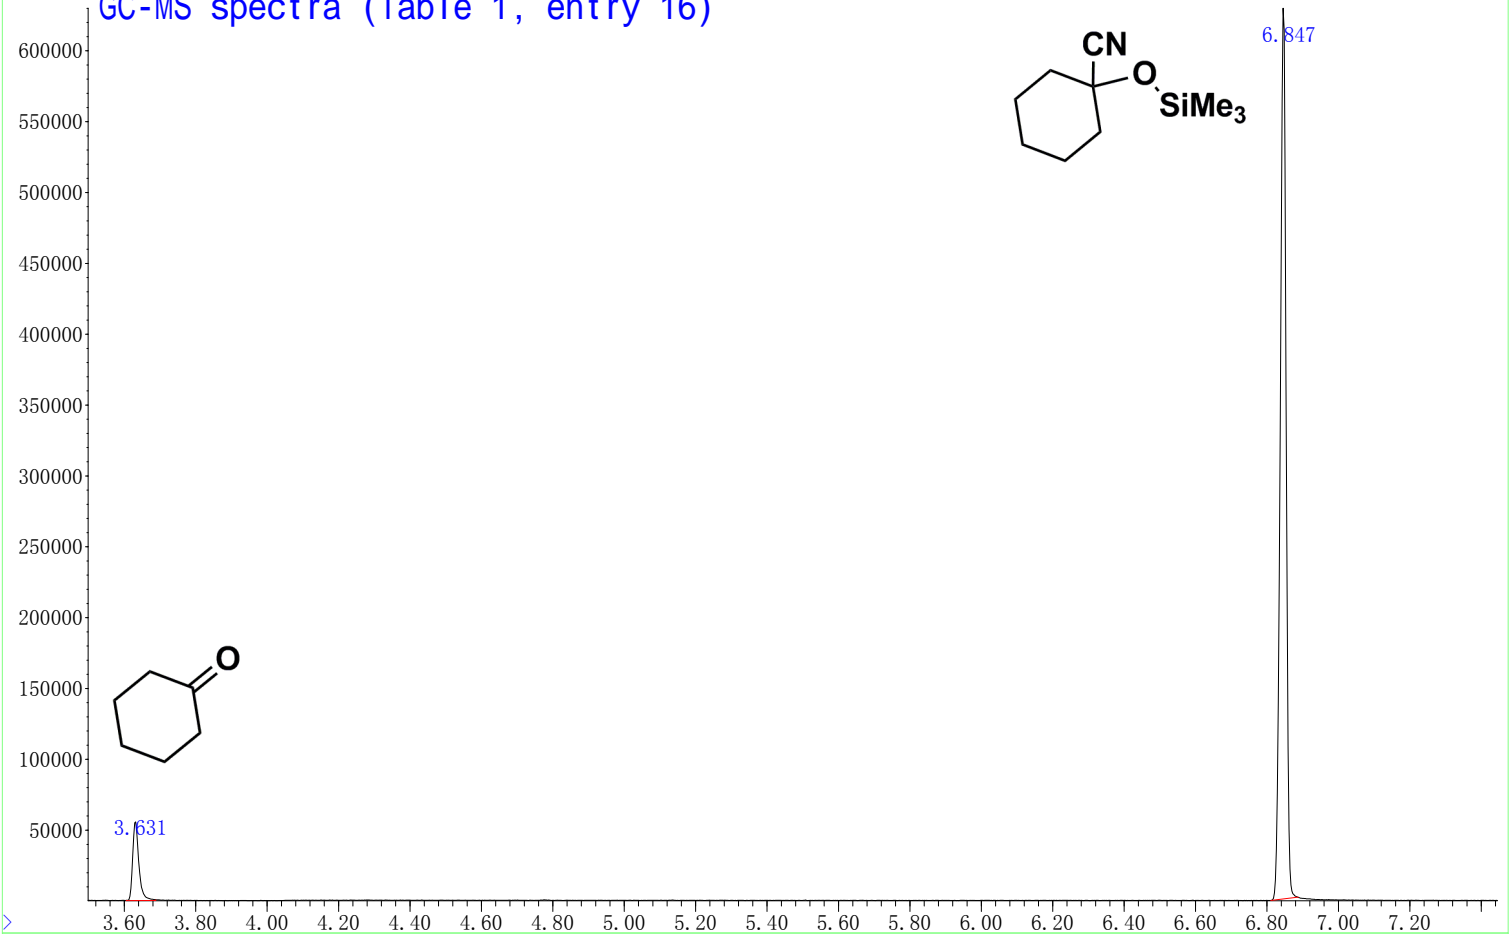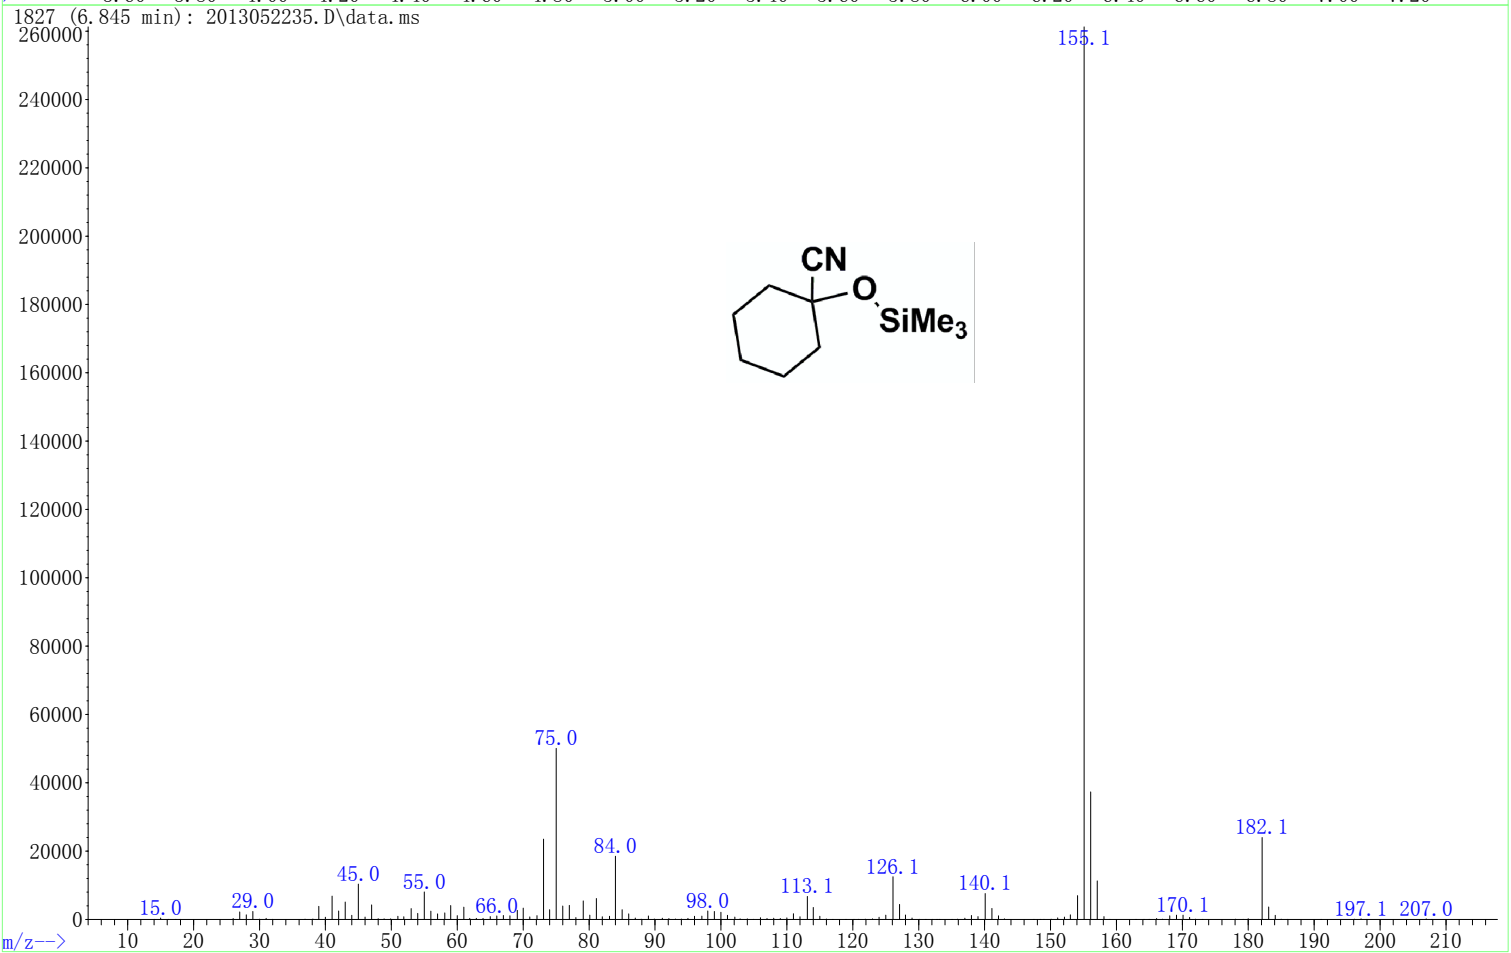

Supplement: c4ta02535k1.pdf [file c4ta02535k1.pdf]
